# Supplementary material for: Copper(ii)-catalyzed cascade approach for the synthesis of pyrrolo[2,1-f][1,2,4]triazine-fused isoquinolines
Source: Royal Society of Chemistry journal article supplement (doi:10.1039/c3ra47324d), 2014-01-01

## Copper(II)-Catalyzed Cascade Approach for the Synthesis of Pyrrolo[2,1-*f*][1,2,4]triazine-Fused Isoquinolines

Jiayang Chen,<sup>[a]</sup> Bo Liu,<sup>[b]\*</sup> Yanhong Chen,<sup>[a]</sup> Qian He,<sup>[a]</sup> and Chunhao Yang<sup>[a]\*</sup>

<sup>a</sup> State Key Laboratory of Drug Research, Shanghai Institute of Materia Medica, 555 Zu Chong Zhi Road, Shanghai 201203, PR China

Fax: +86-21-50806770

E-mail: [chyang@sim.ac.cn](mailto:chyang@sim.ac.cn)

<sup>b</sup> Guangdong Provincial Academy of Chinese Medical Sciences, (The Second Affiliated Hospital of Guangzhou University of Chinese Medicine), 5th Floor, Science Building, 55 Neihuanxi Road, Guangzhou Higher Education Mega Center, Guangzhou, 510006, P.R. China. E-mail: [doctliu@263.net](mailto:doctliu@263.net)

### Supporting information

# <sup>1</sup>H NMR and <sup>13</sup>C NMR Spectrum of Compounds

## Compound 2f

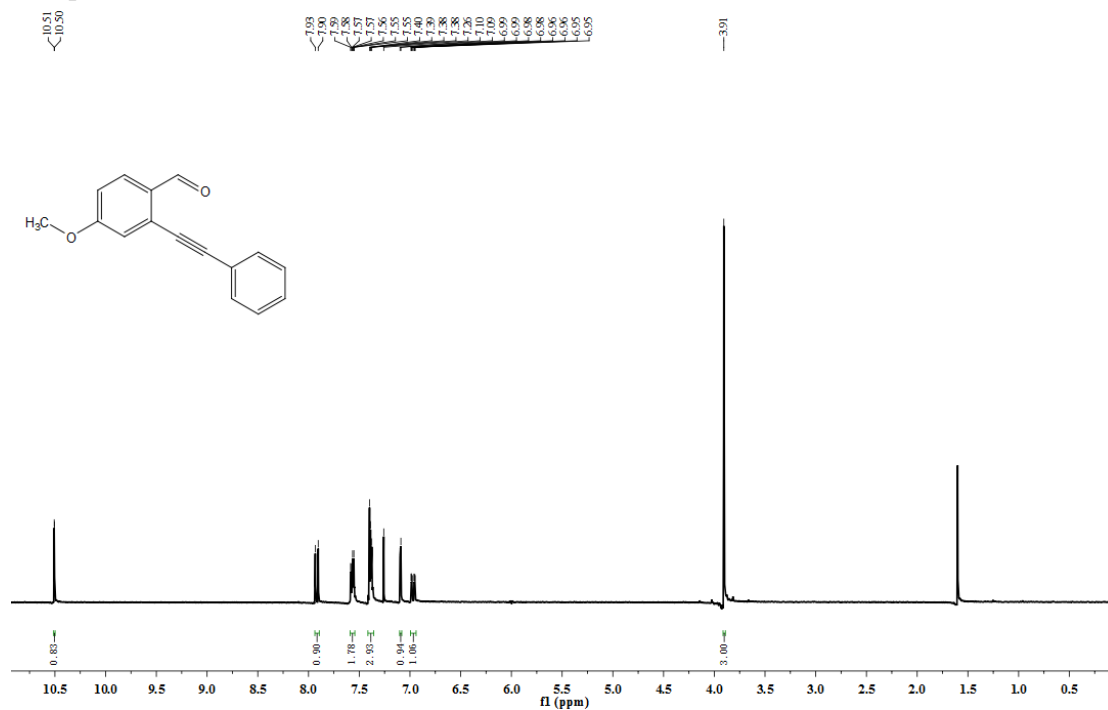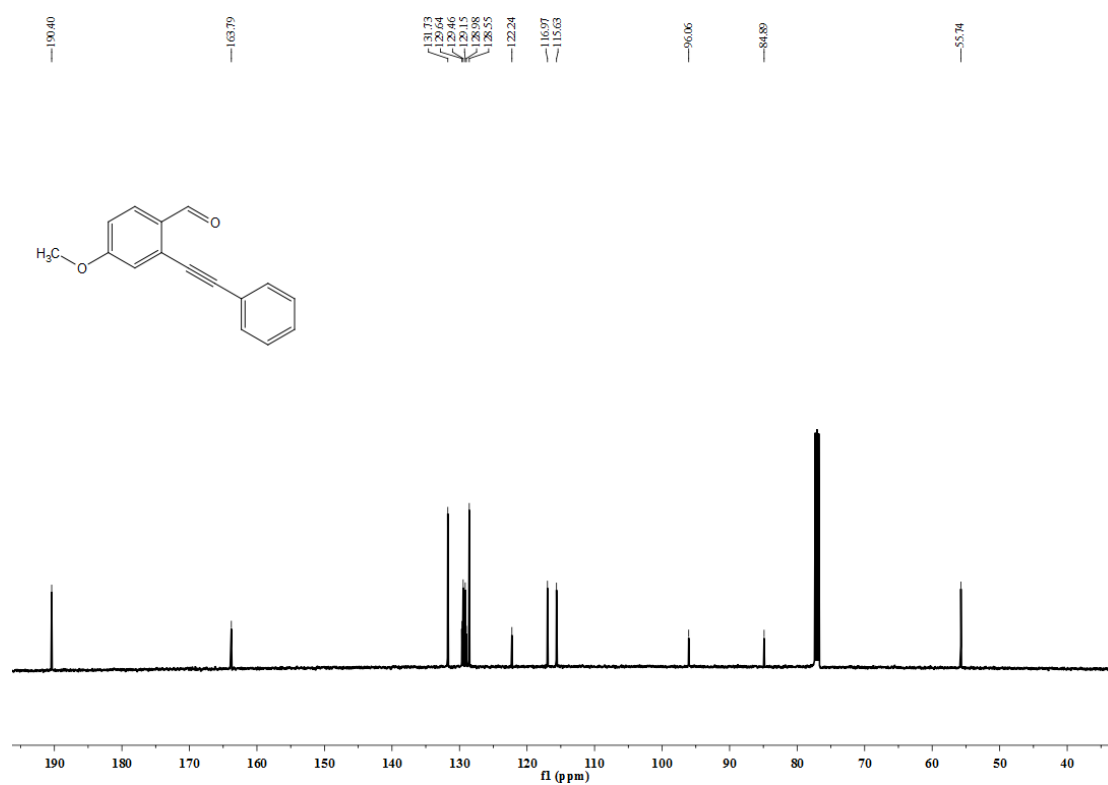

# Compound 2g

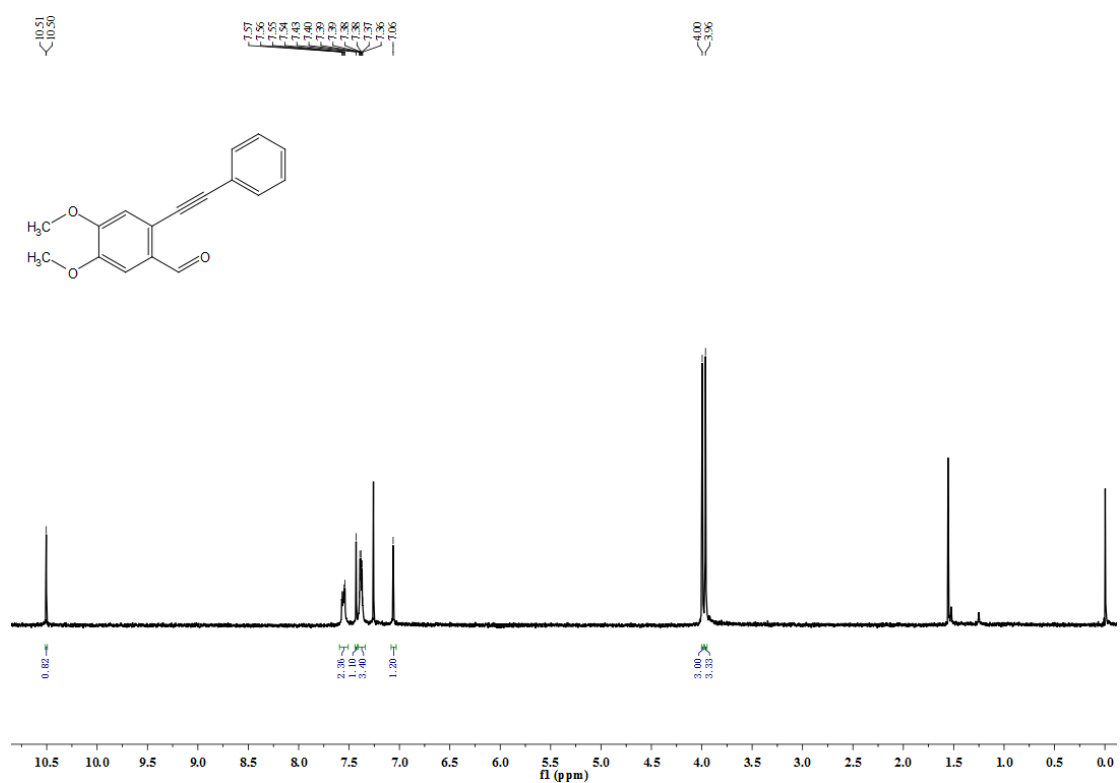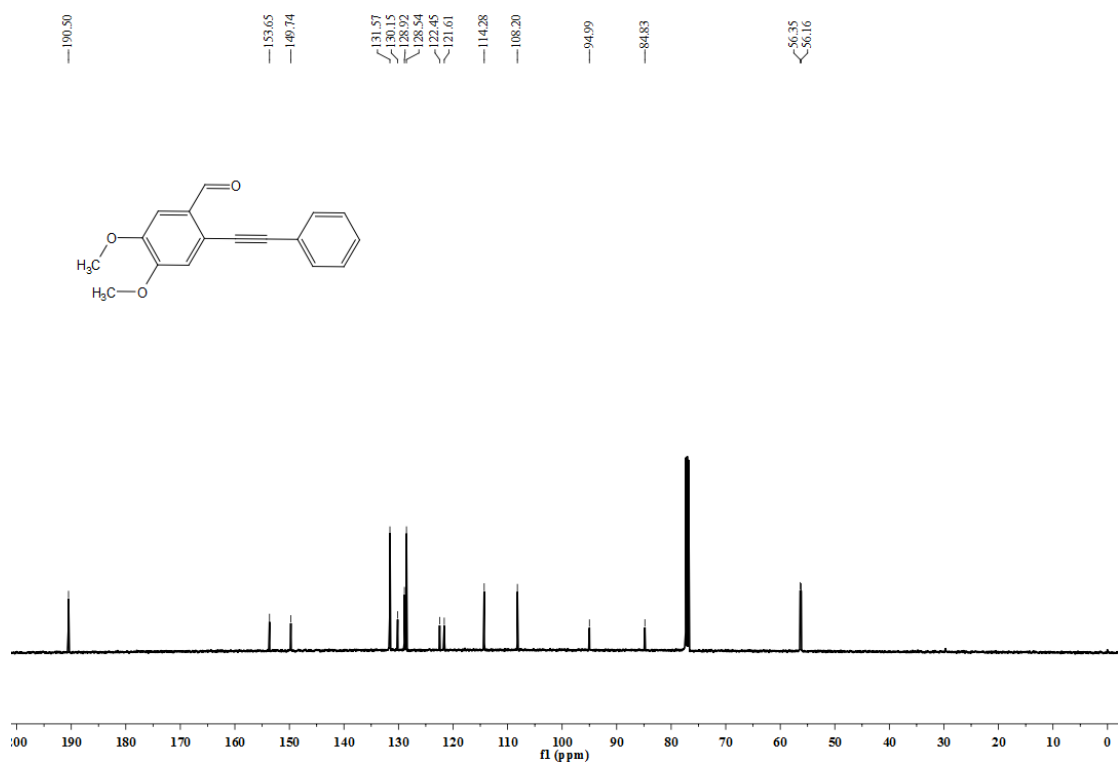

# Compound 2l

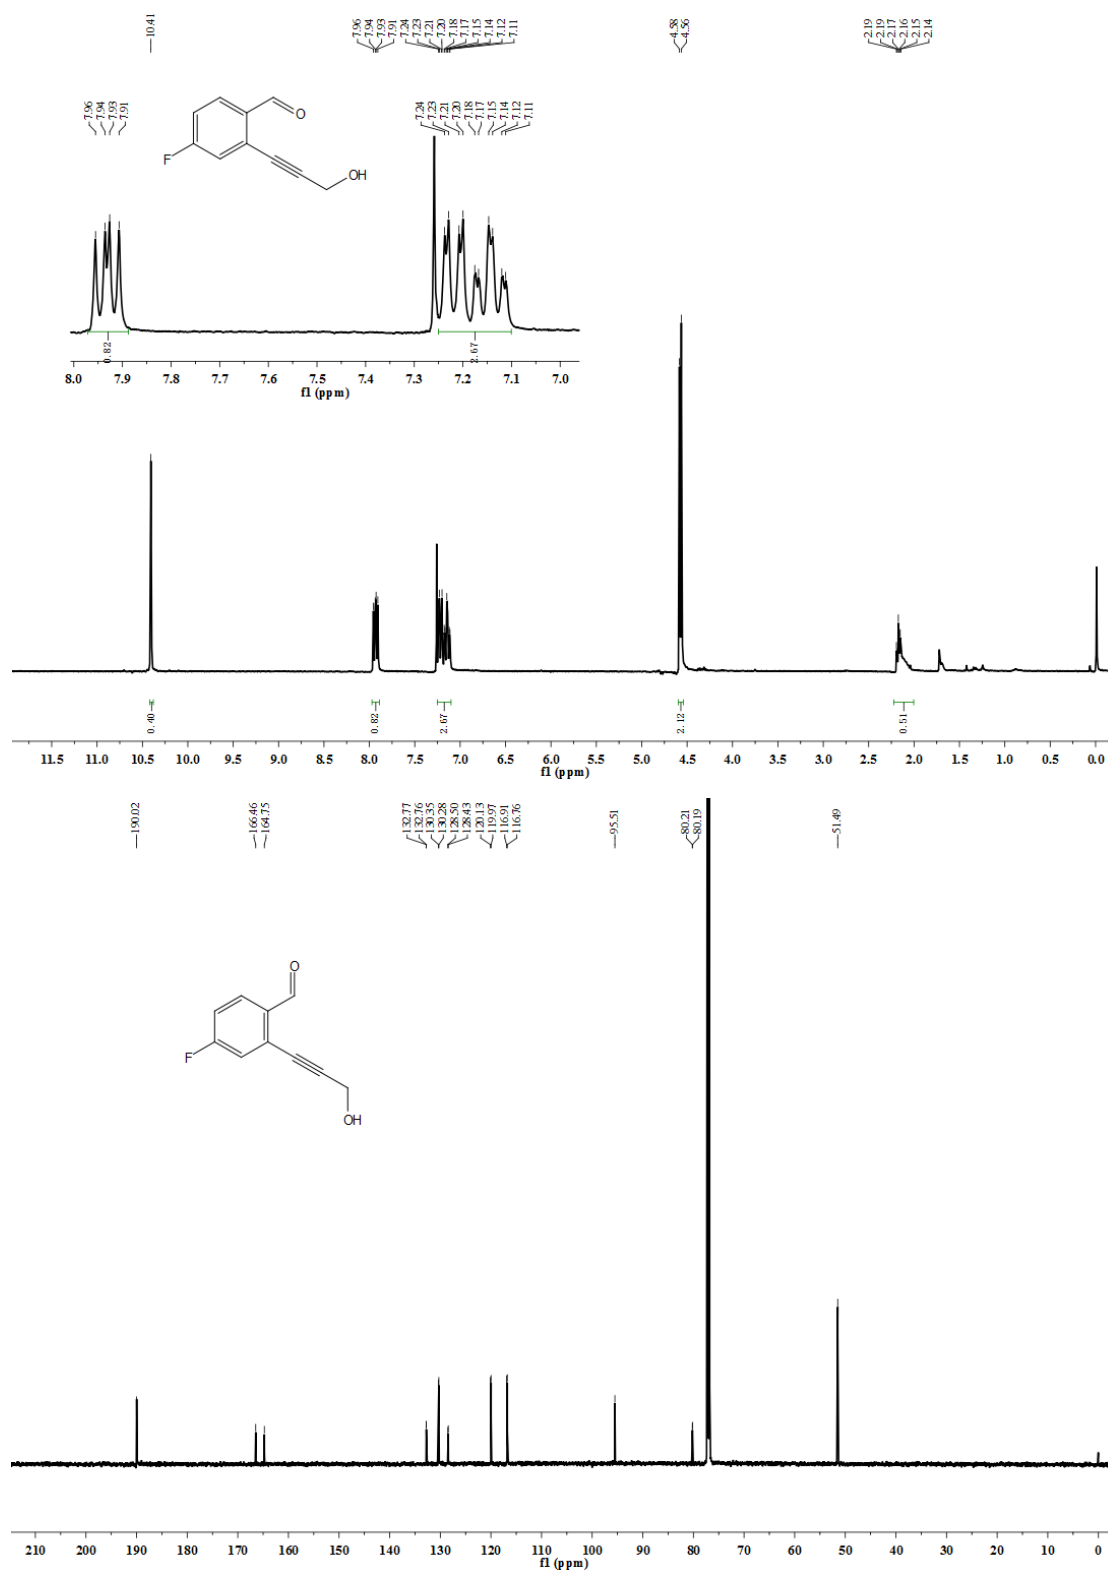

# Compound 3a

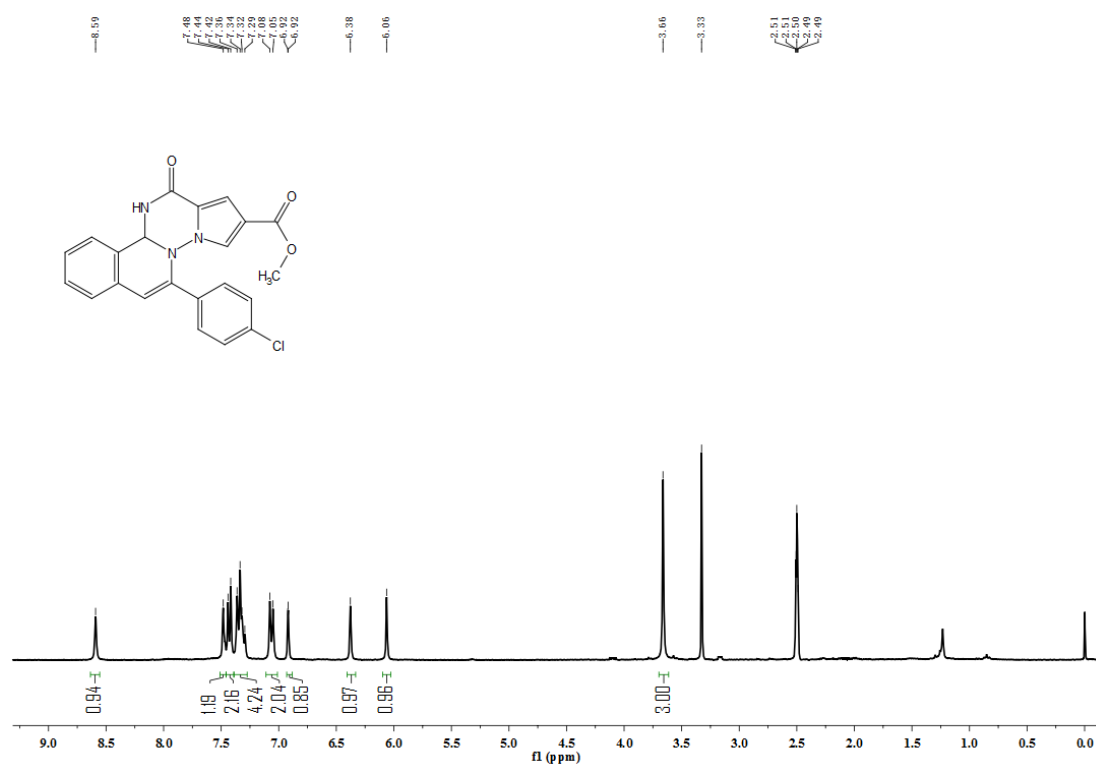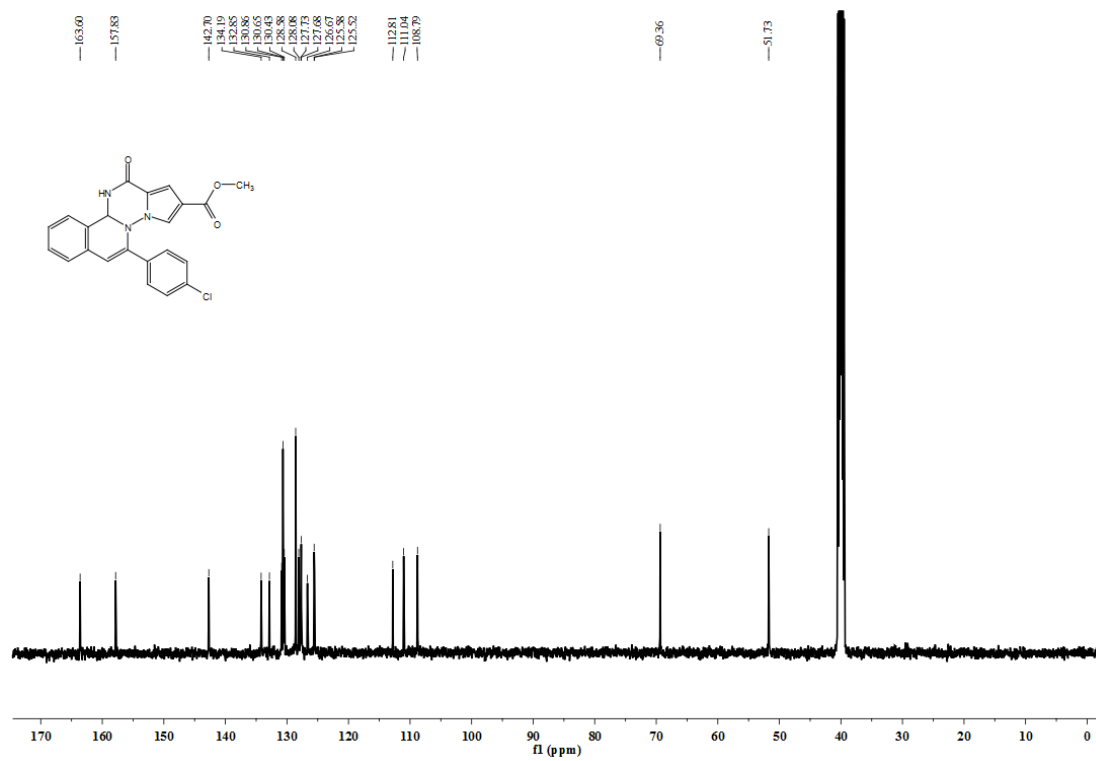

# Compound 3b

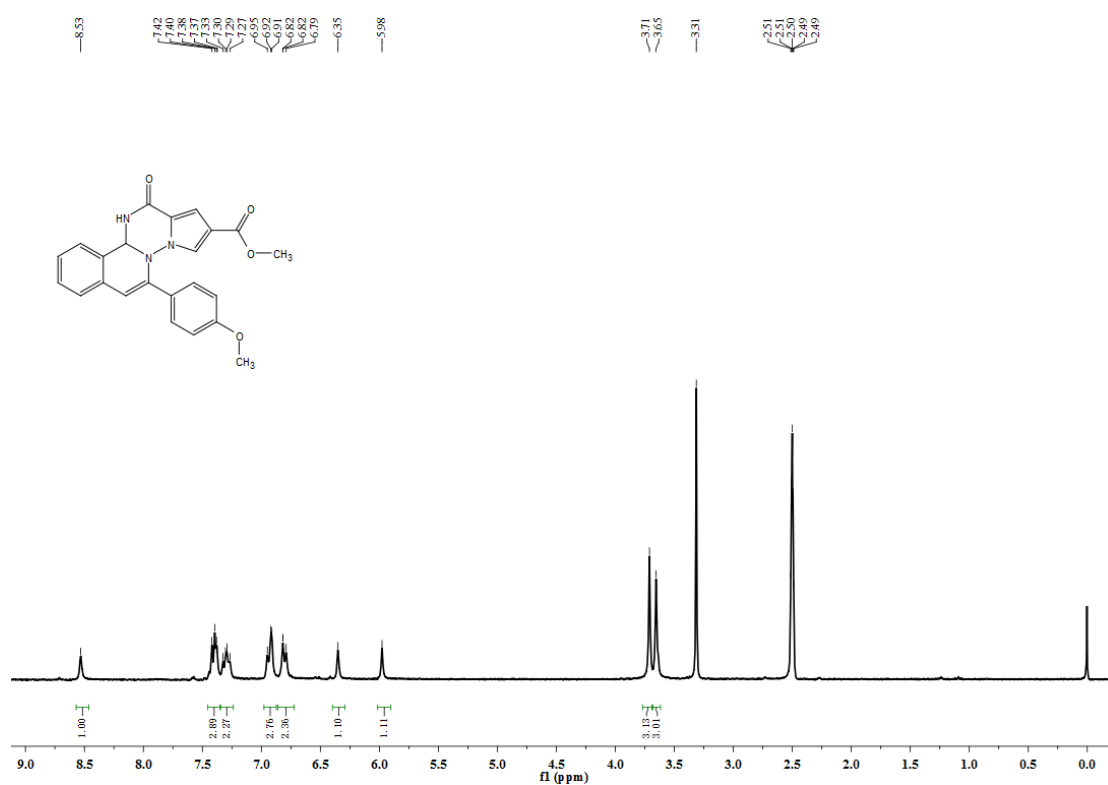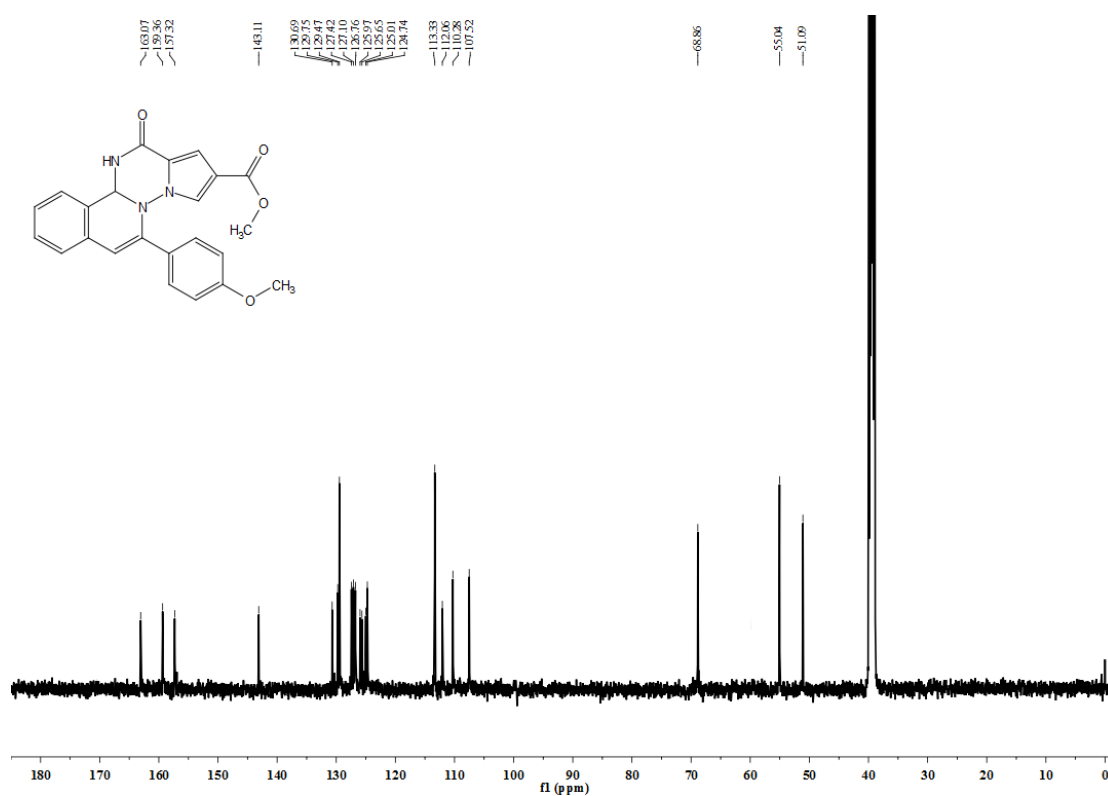

# Compound 3c

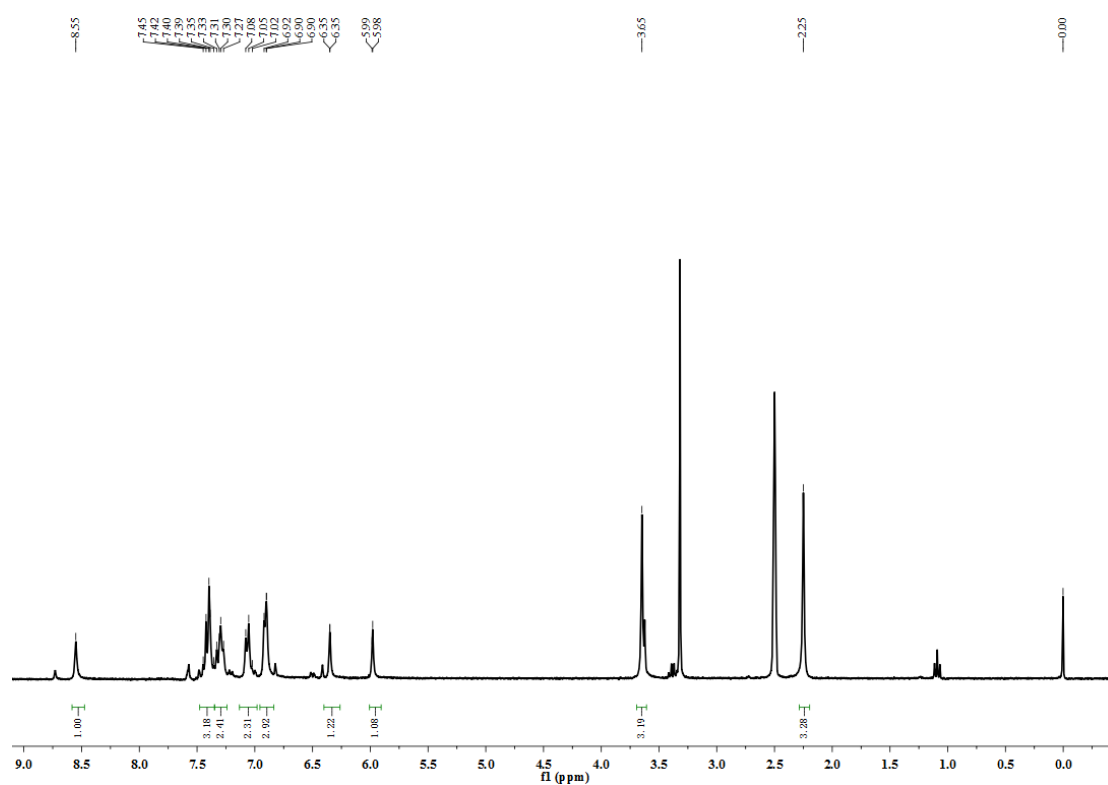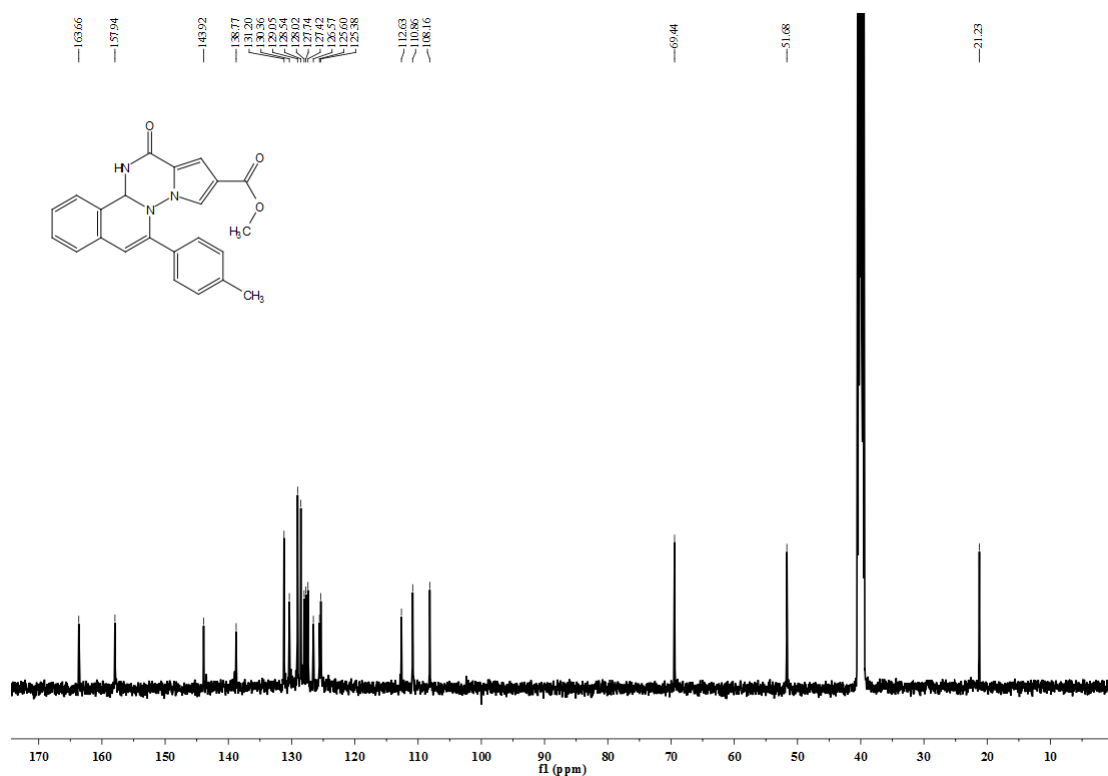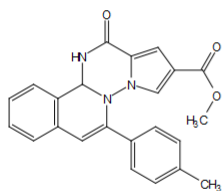

# Compound 3d

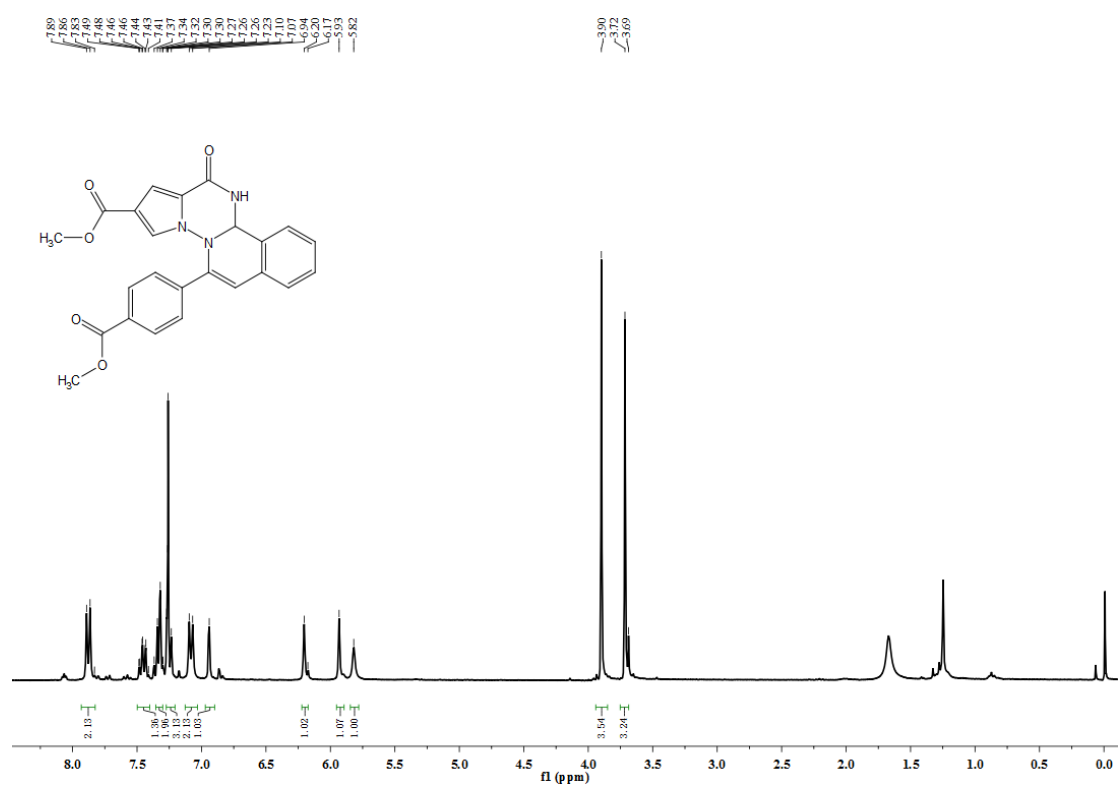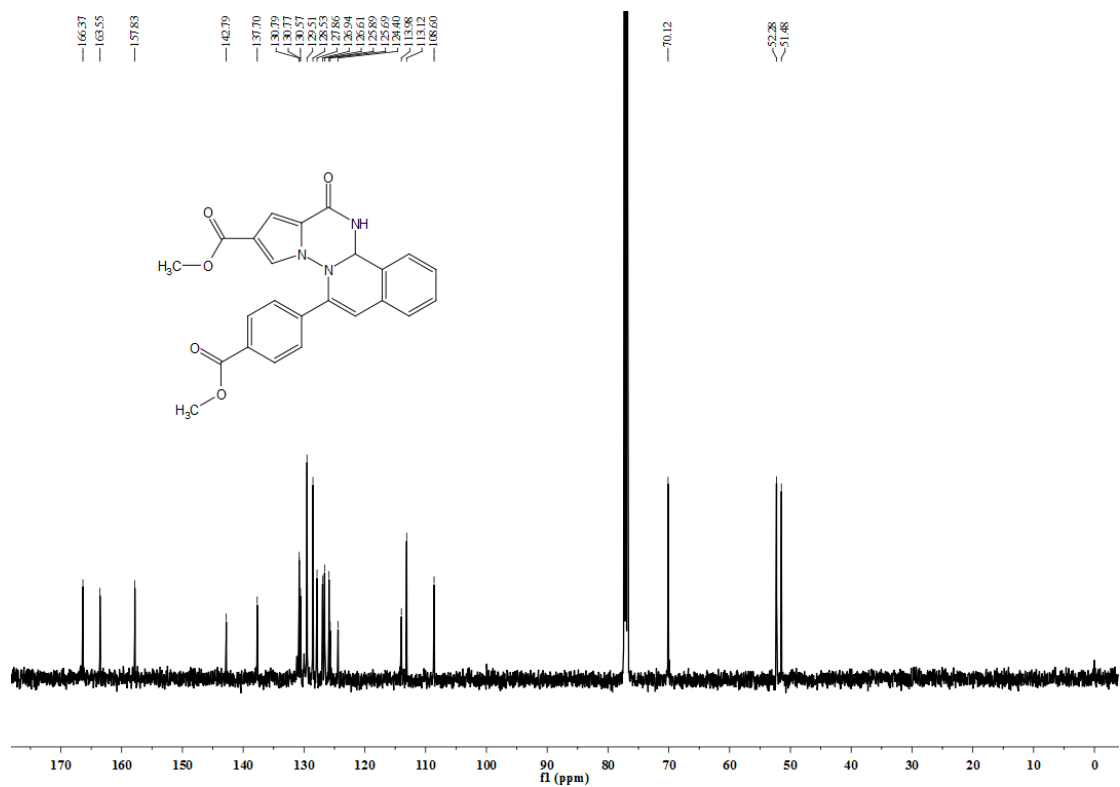



# Compound 3e

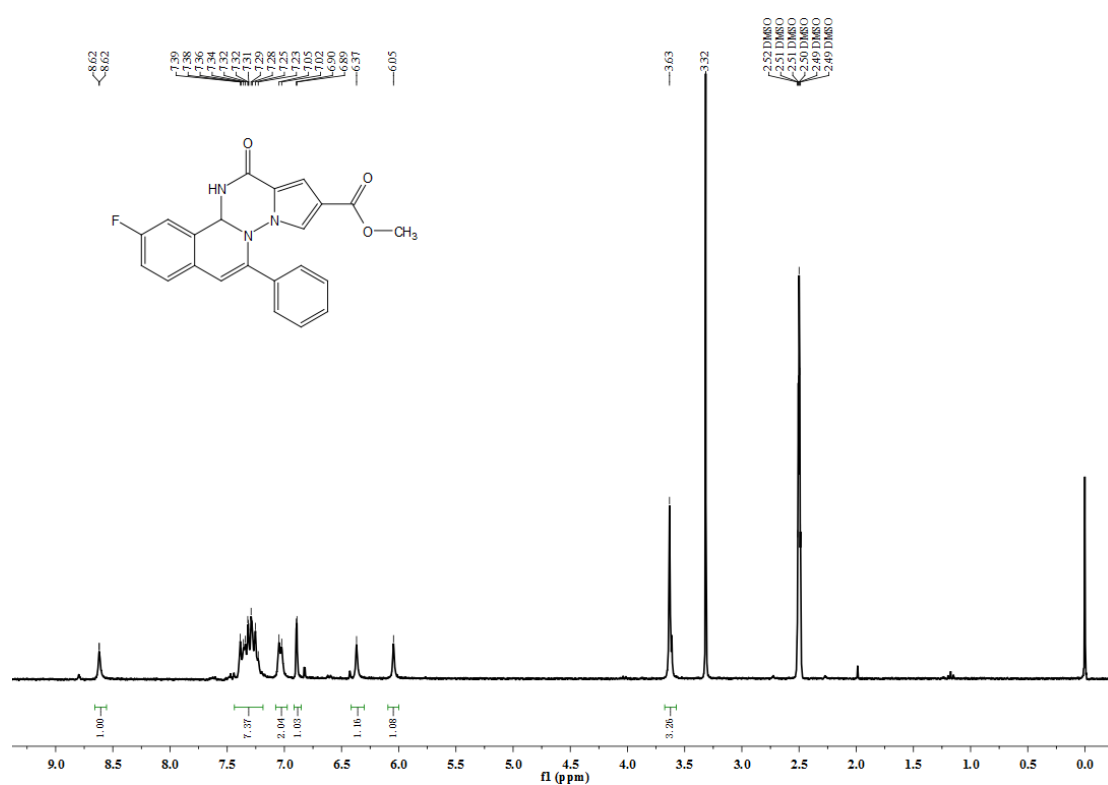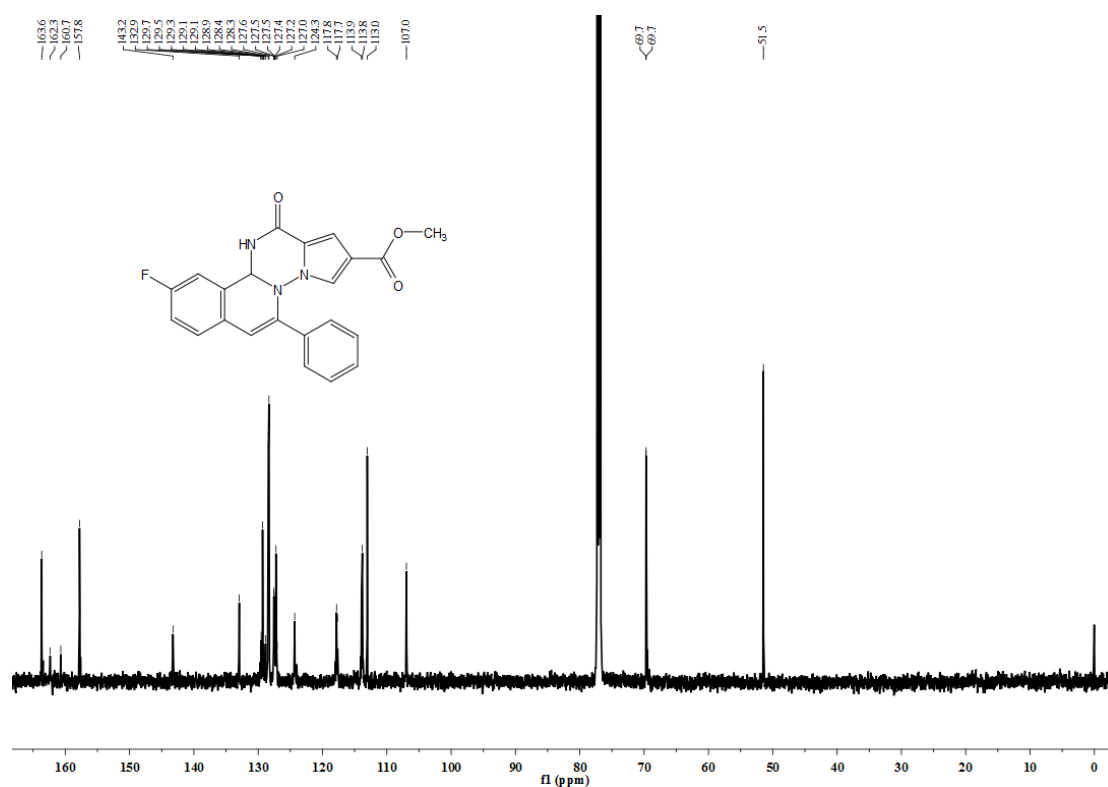

# Compound 3f

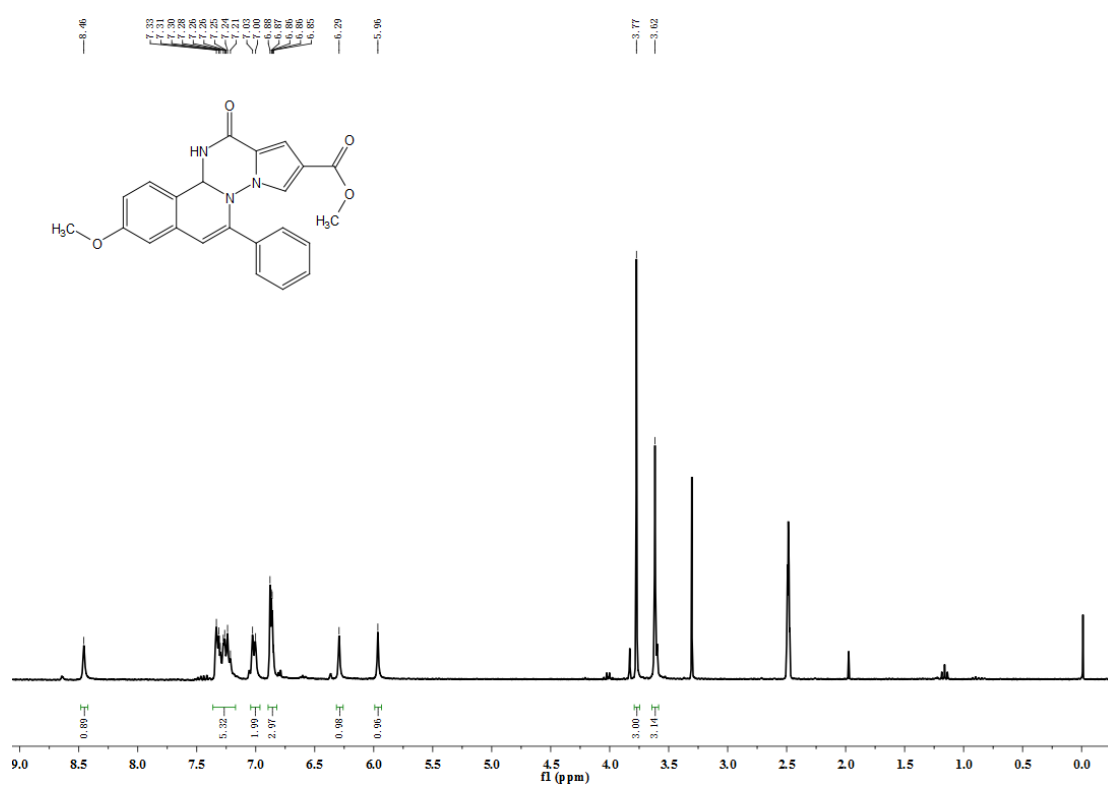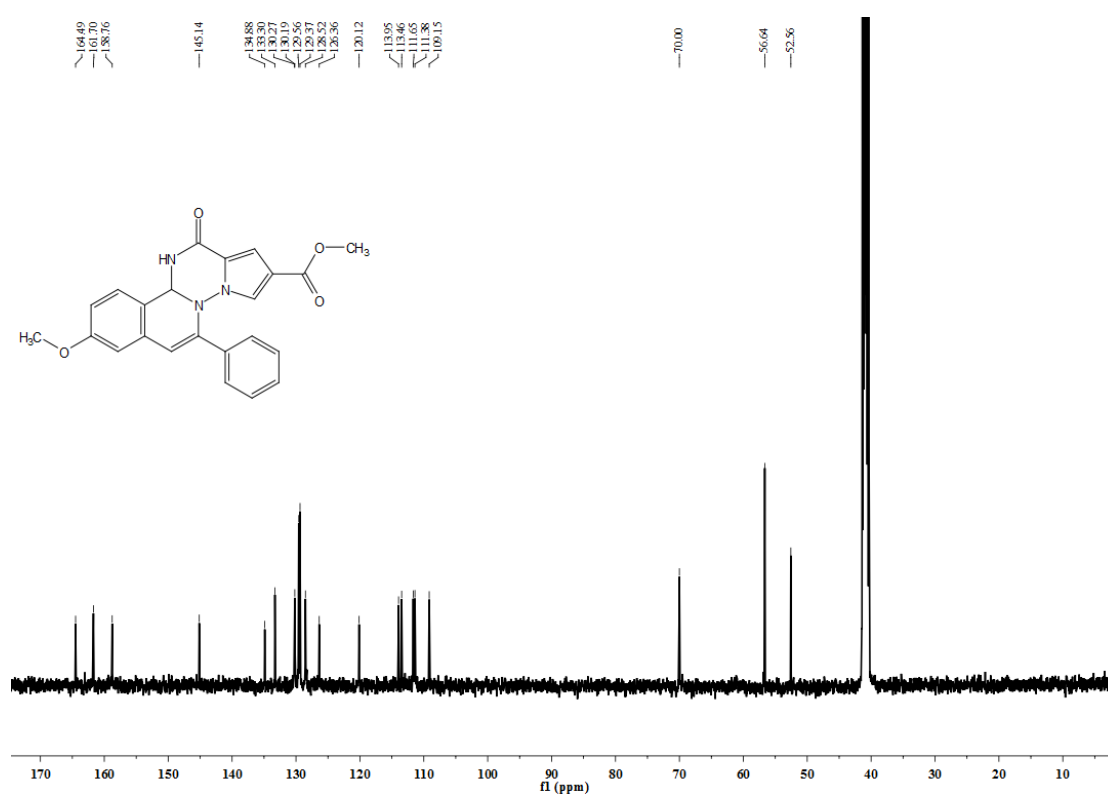

# Compound 3h

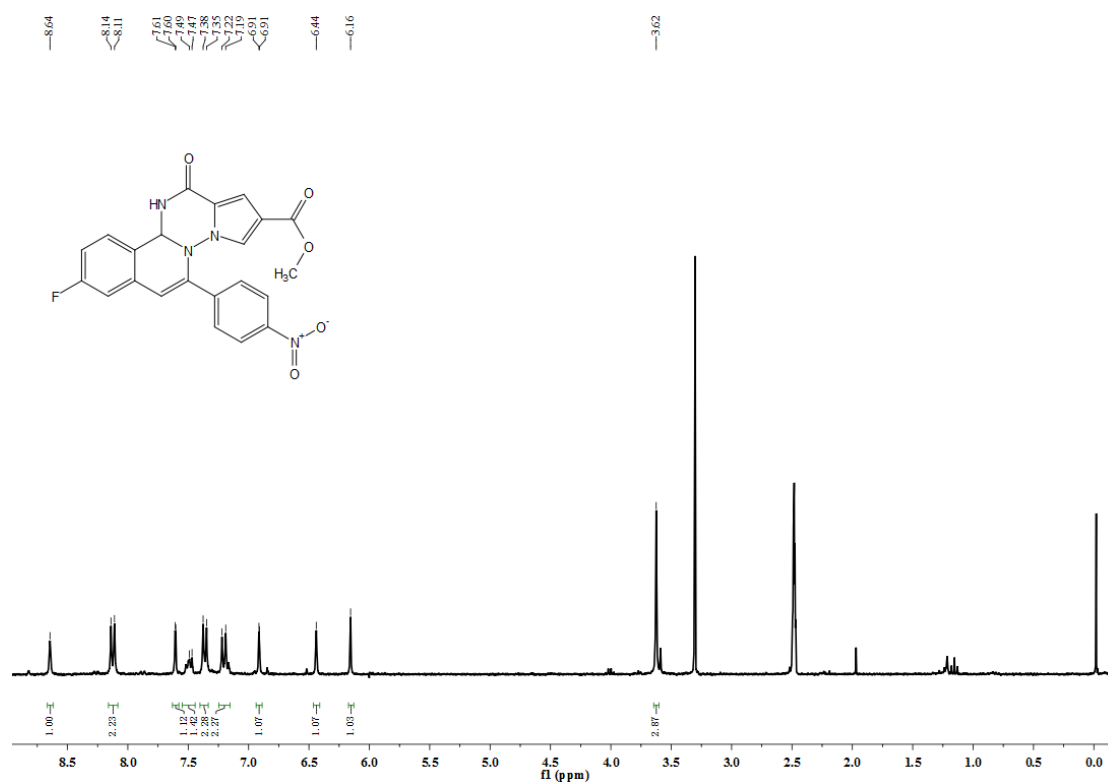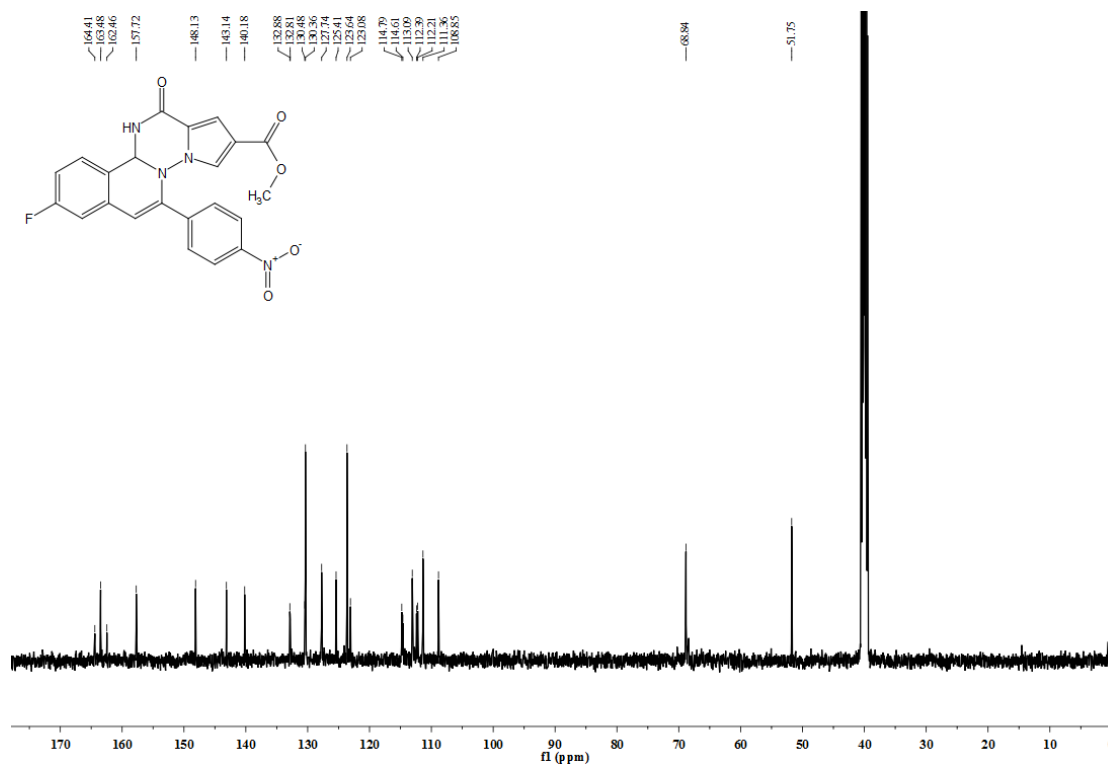

# Compound 3i

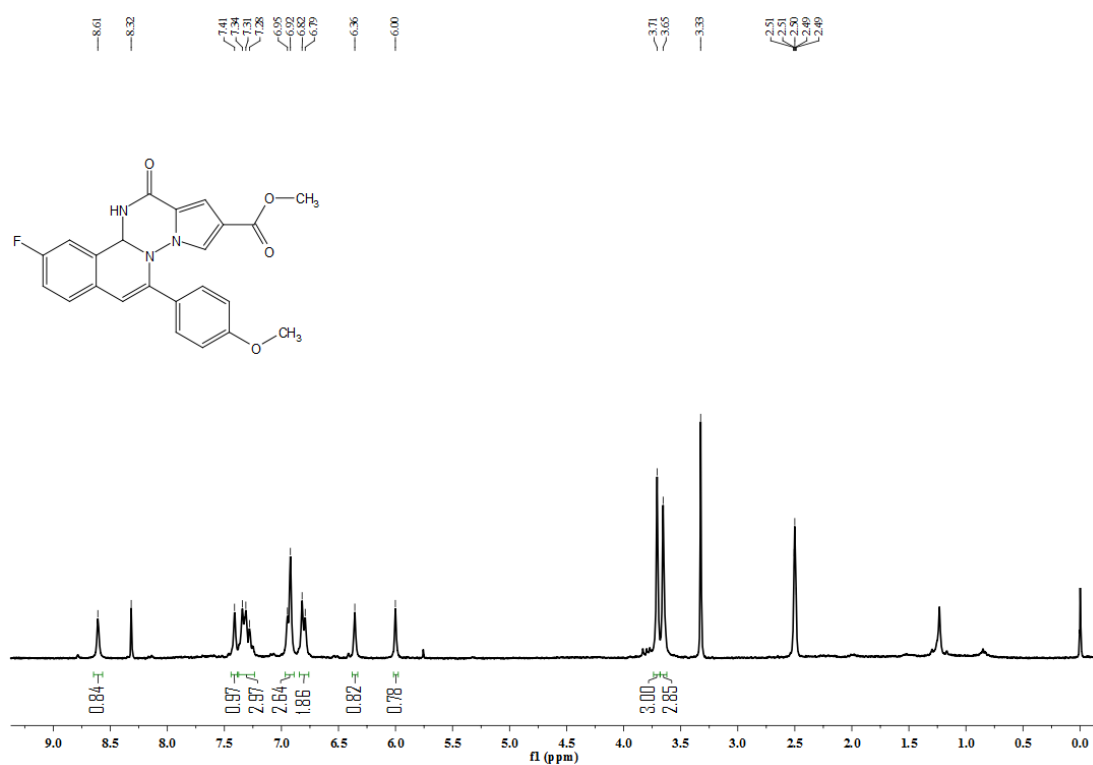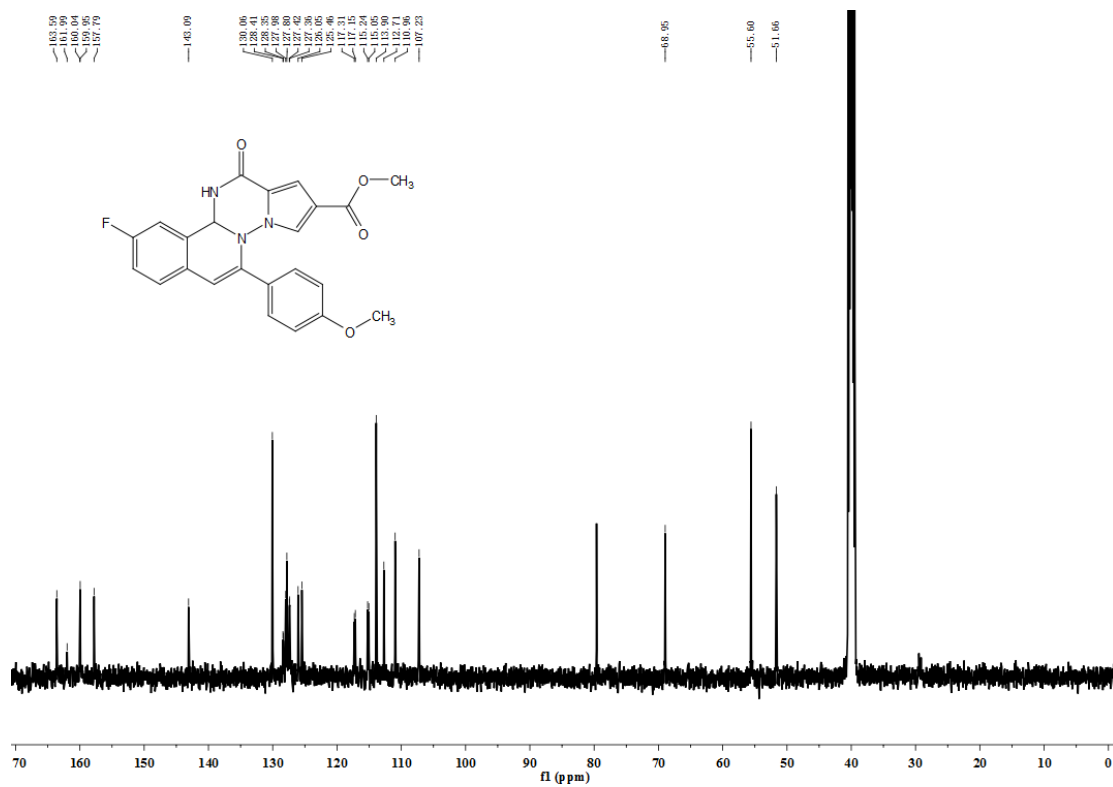

# Compound 3j

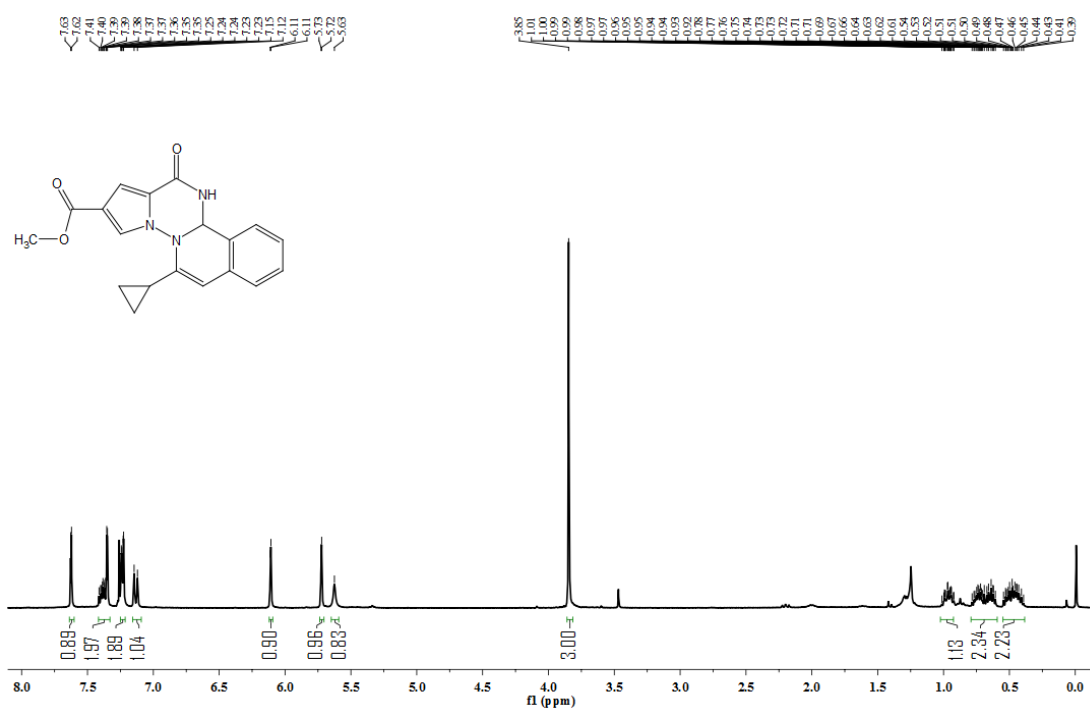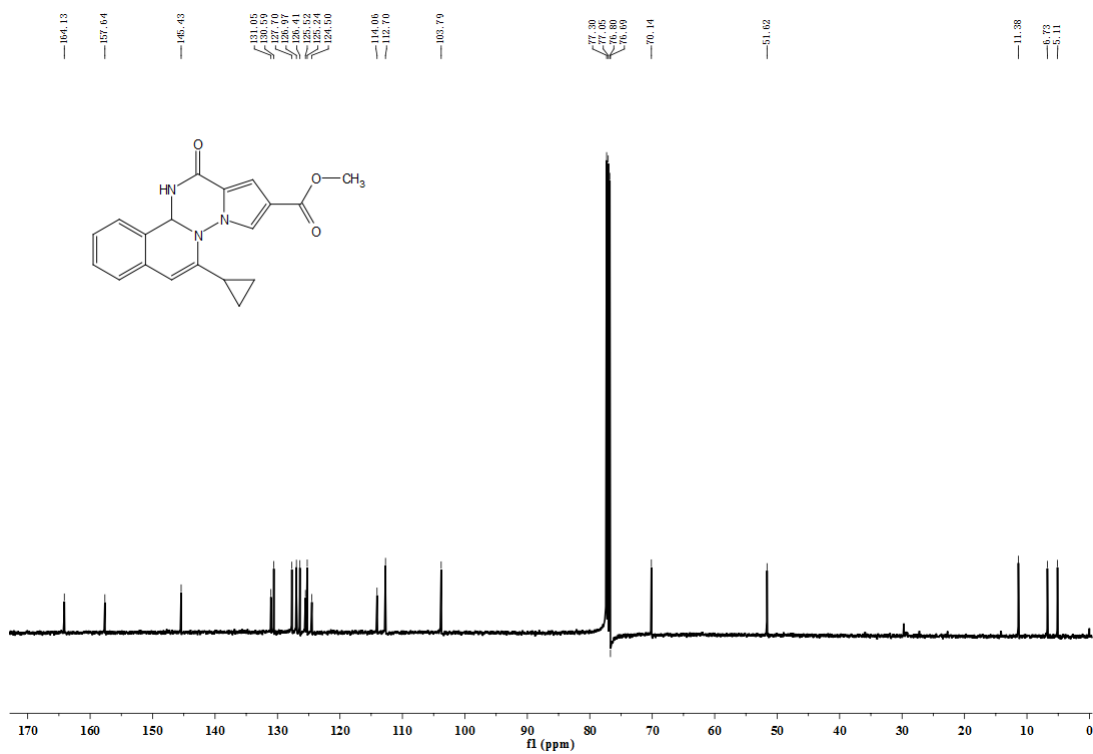

# Compound 3k

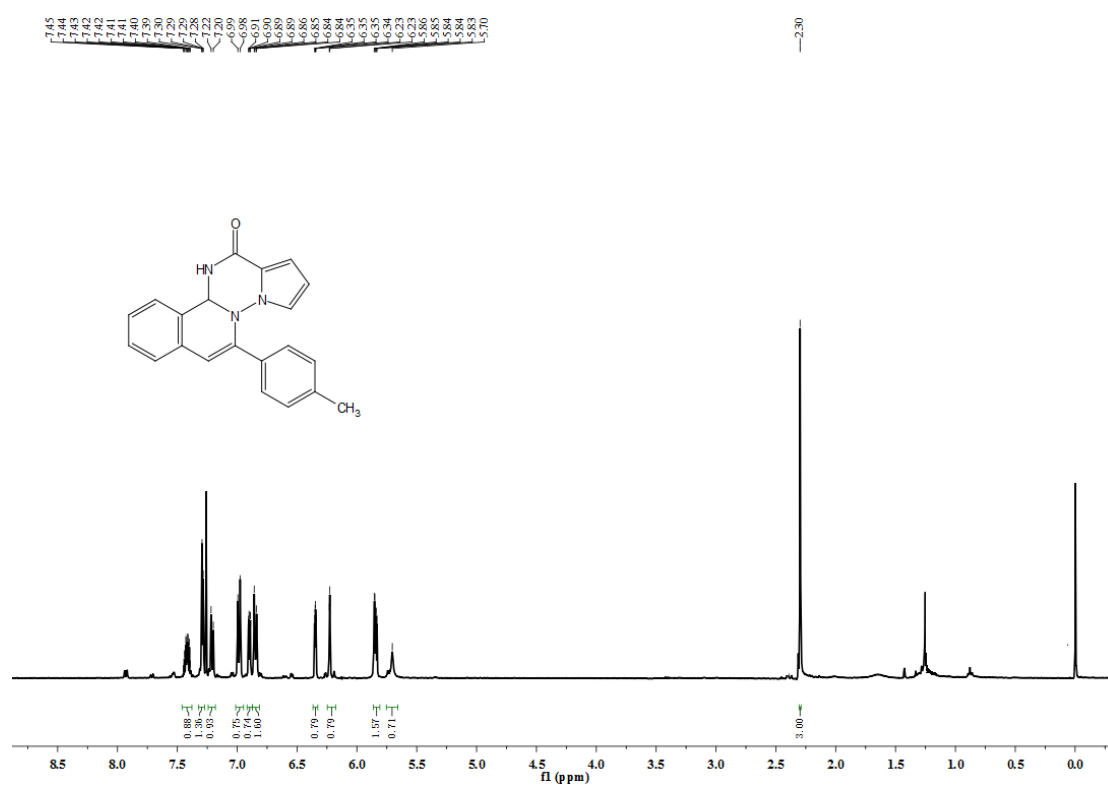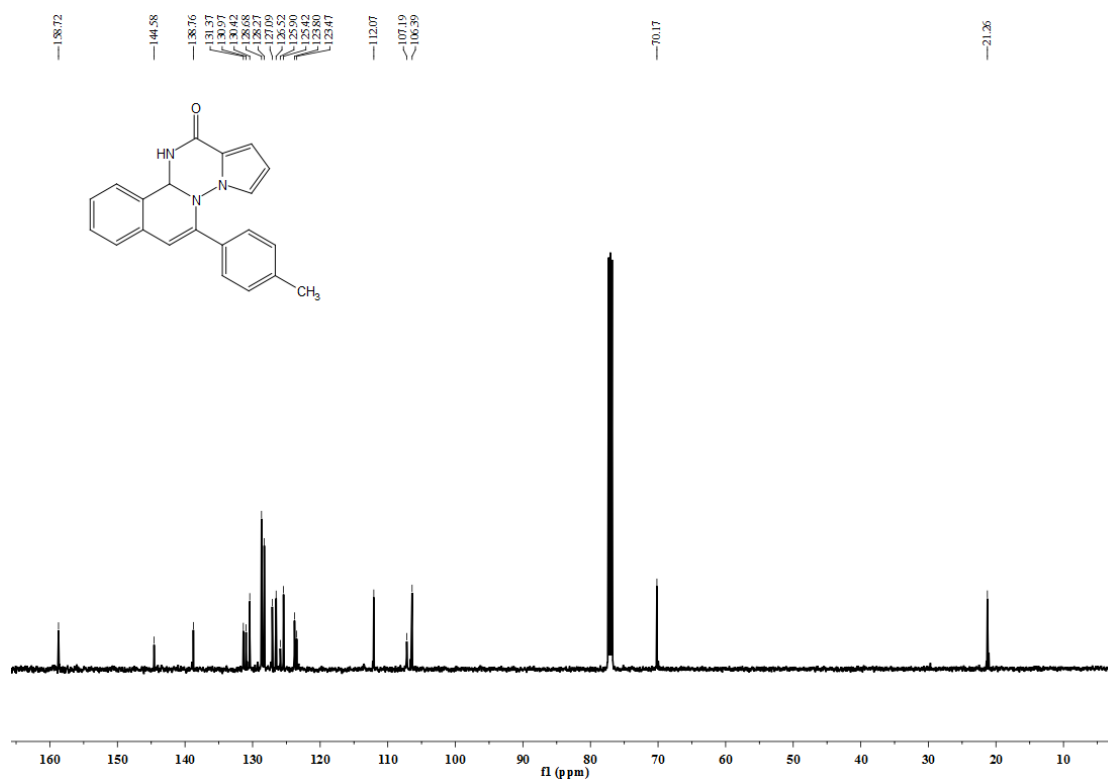

# Compound 3l

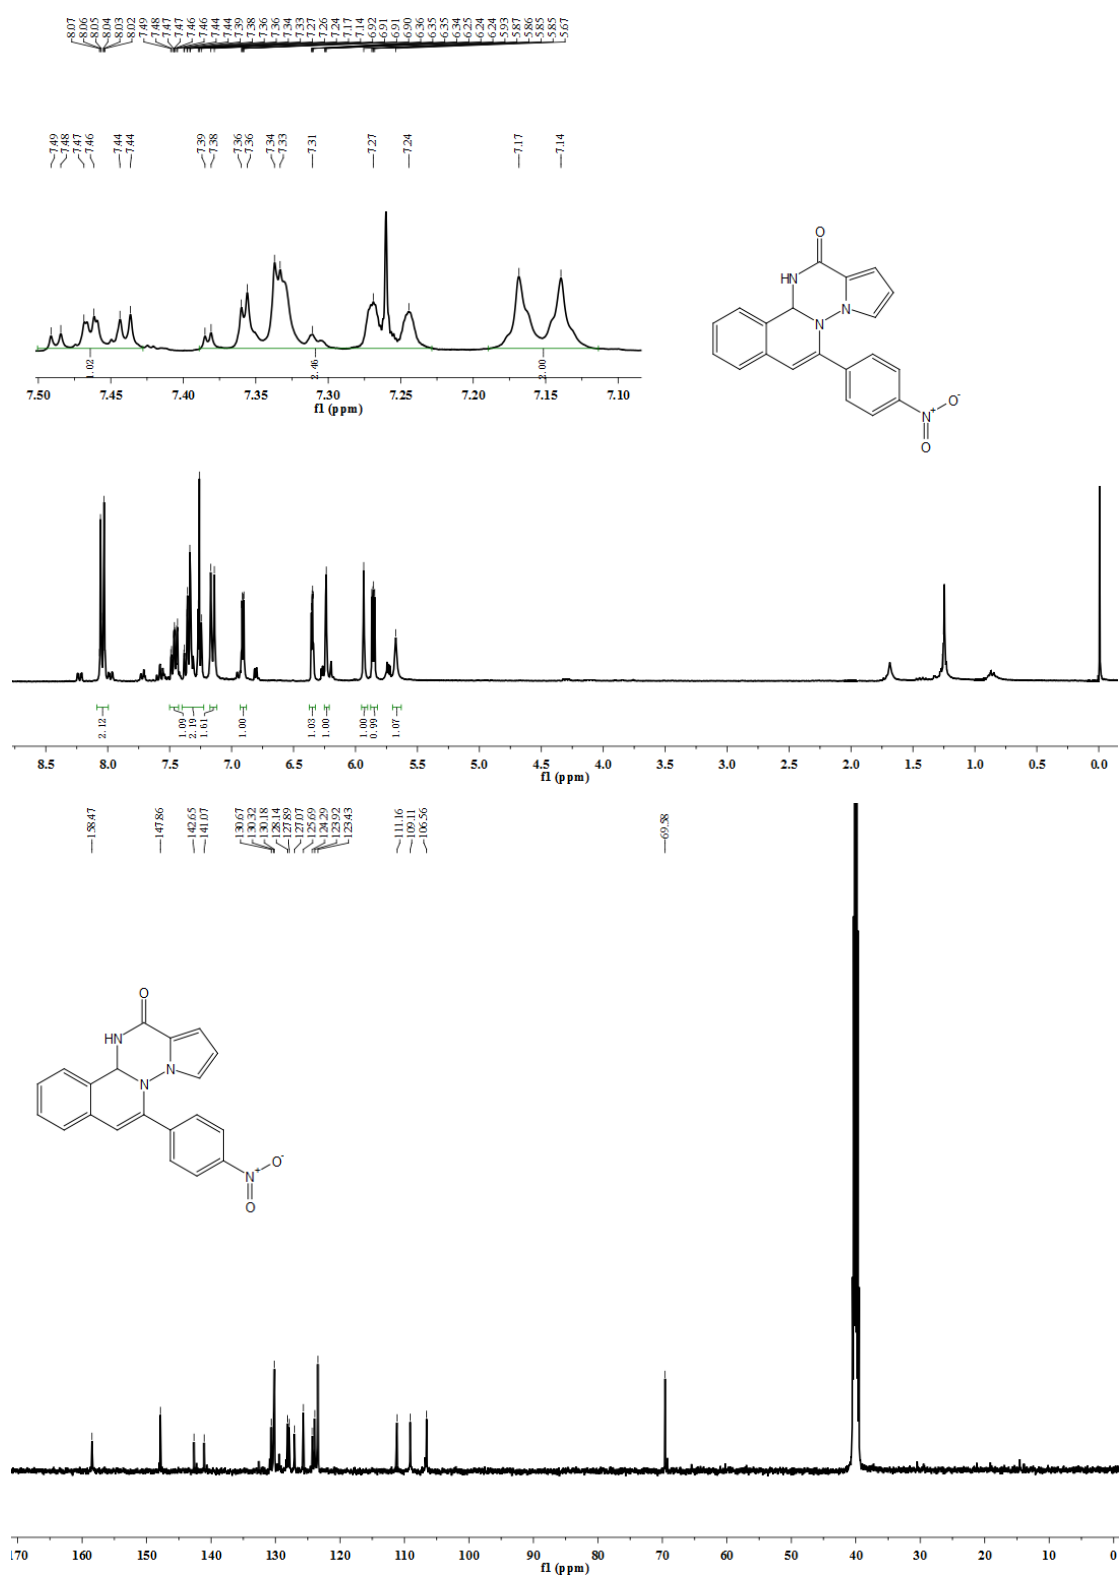

### Detection of brominated product of compound **31**

Analytical HPLC: Agilent 1200 series, Eclipse XDB-C<sub>18</sub> Column (4.6 × 150 mm, 5 micron particle size), mobile phase: CH<sub>3</sub>OH / 0.1% aqueous HCOOH in water linear gradient over 15 min (the gradient of CH<sub>3</sub>OH is from 5% to 95% over 0-6 min); Flow = 1.0 ml /min, Detected by UV at 254 nm; 40 °C Column Temperature;

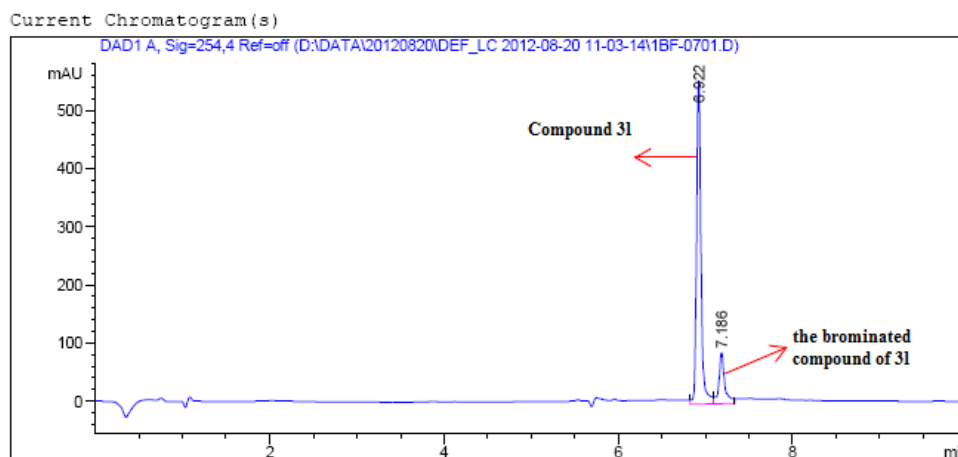

Signal 1: DAD1 A, Sig=254,4 Ref=off

| Peak # | RetTime [min] | Type | Width [min] | Area [mAU*s] | Height [mAU] | Area %  |
|--------|---------------|------|-------------|--------------|--------------|---------|
| 1      | 6.922         | BV   | 0.0556      | 1988.89404   | 557.20325    | 83.1344 |
| 2      | 7.186         | VV   | 0.0660      | 403.48920    | 87.17760     | 16.8656 |

Totals : 2392.38324 644.38084

LR-MS(ESI): For **31**: Found, 359.1(100%, [M+H]<sup>+</sup>), t = 7.292 min; For the brominated product of compound **31** : Found, 459.1(25%, [M+Na]<sup>+</sup>), 461.1 (25%, [M+2+Na]<sup>+</sup>), t = 7.563 min.



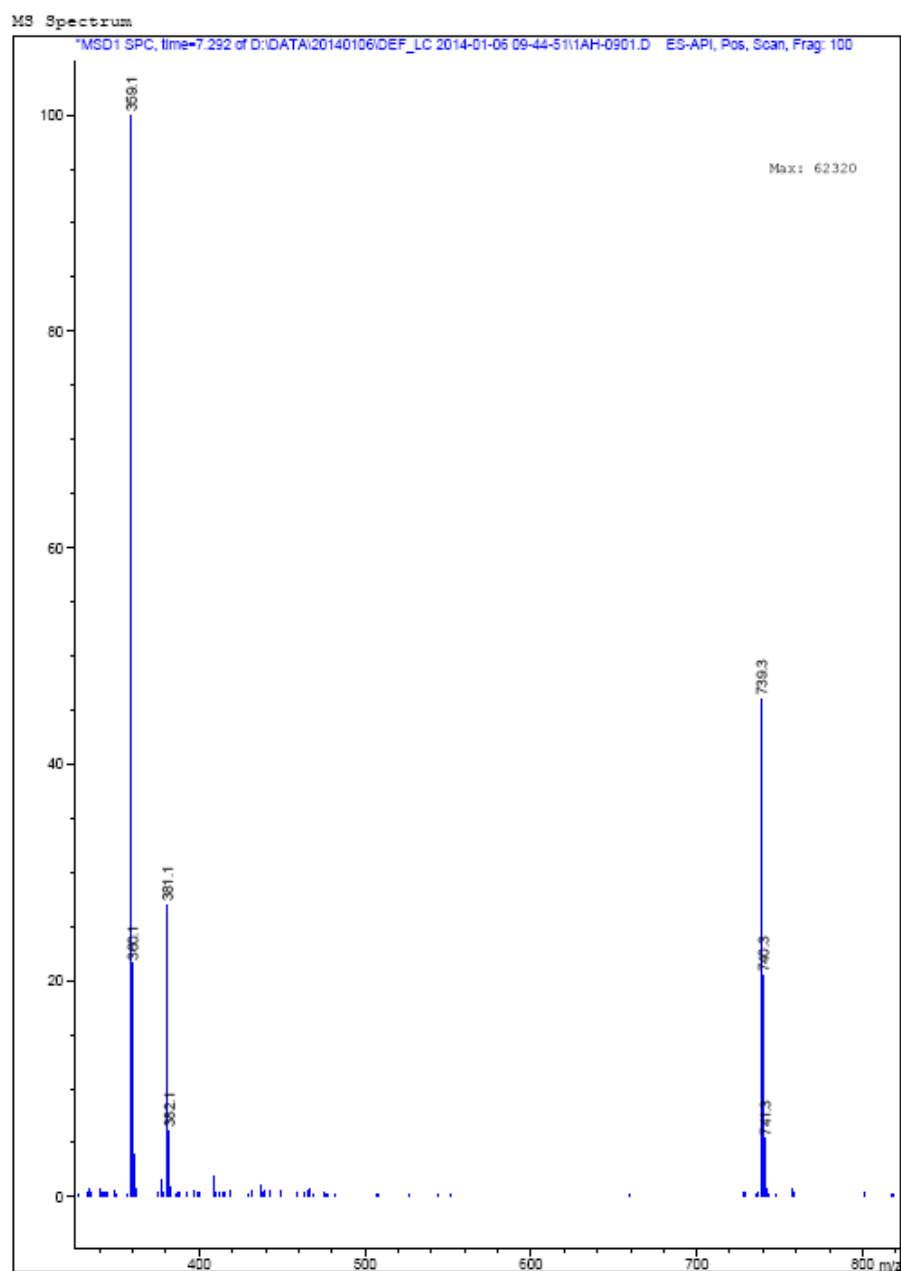

MS Spectrum

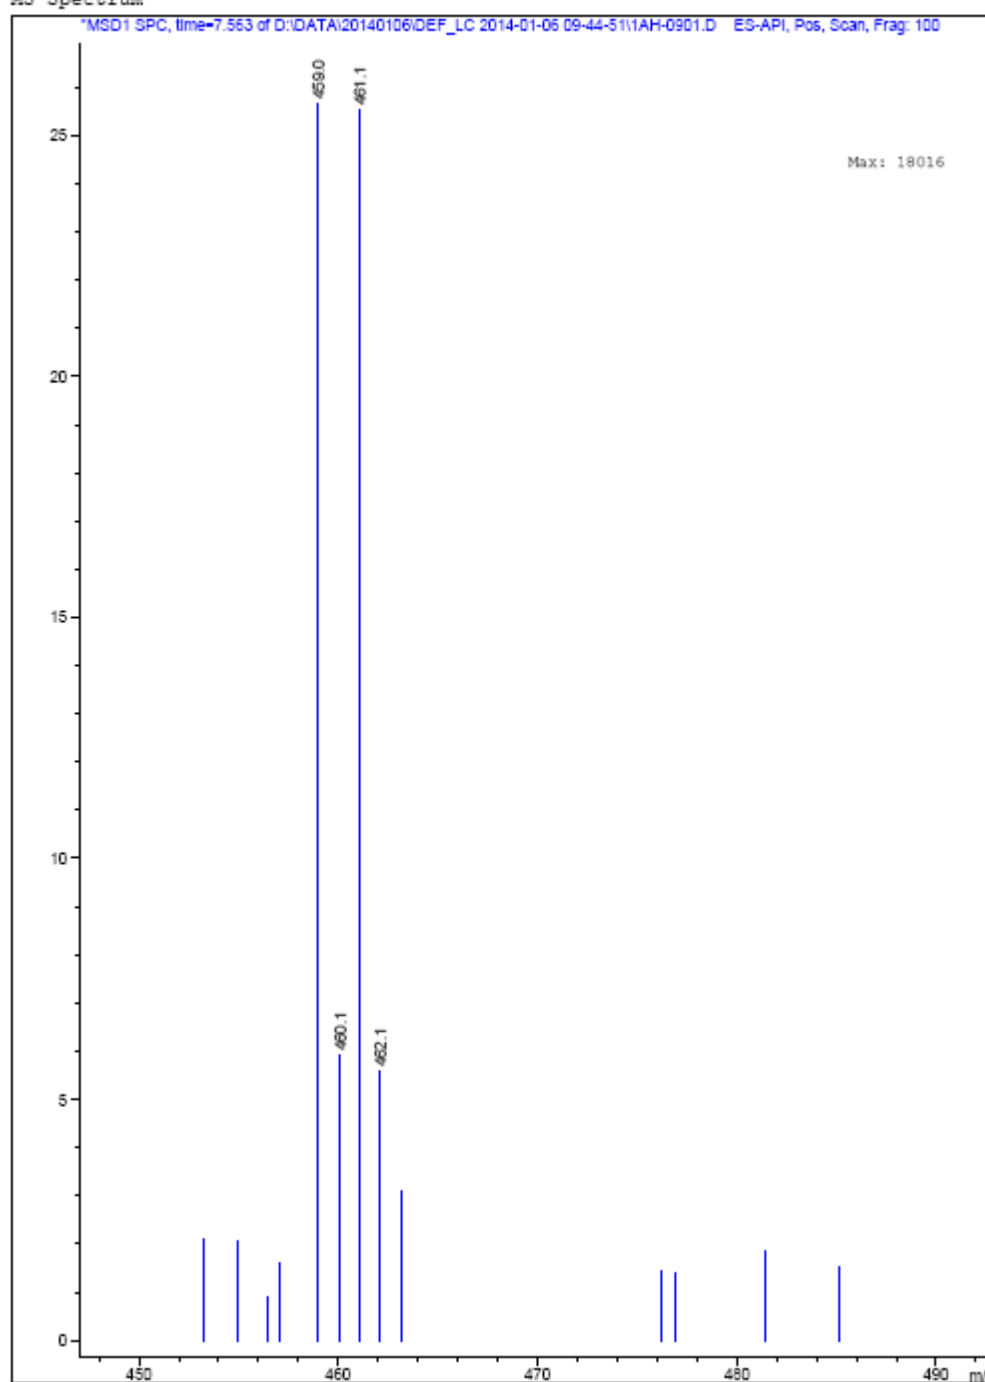

The  $^1\text{H}$ -NMR of the pure compound **3l**:

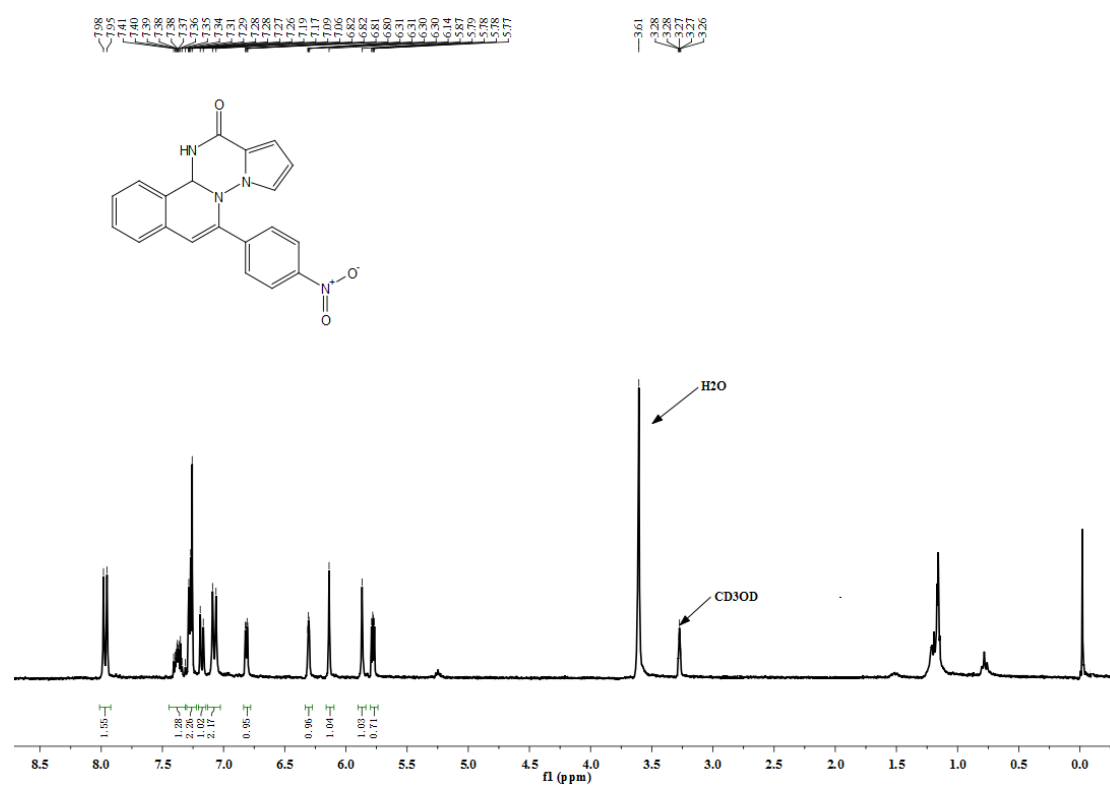

# Compound 3m

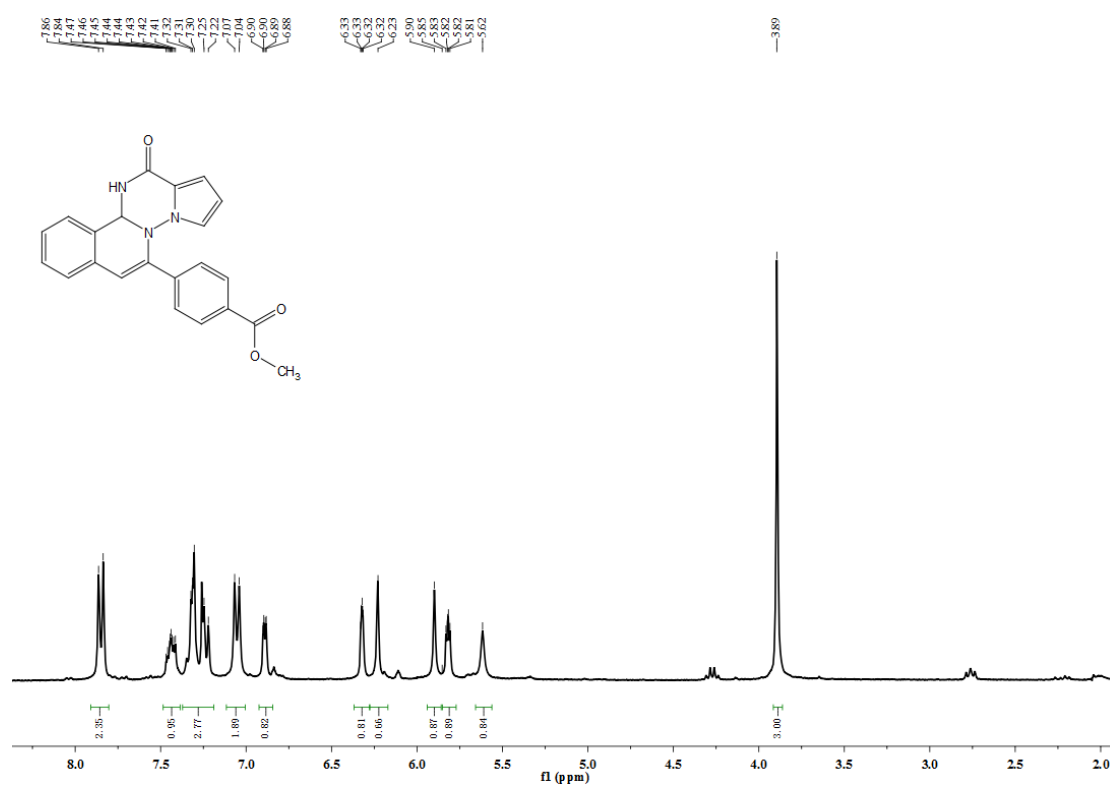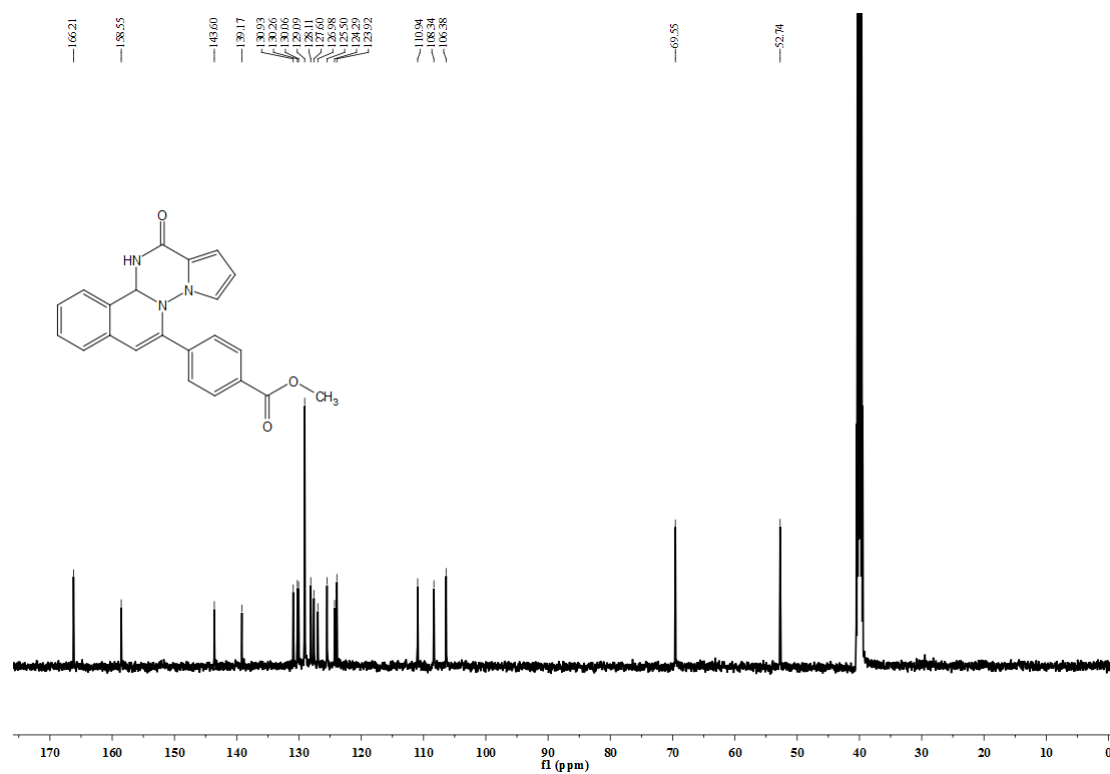

# Compound 3n

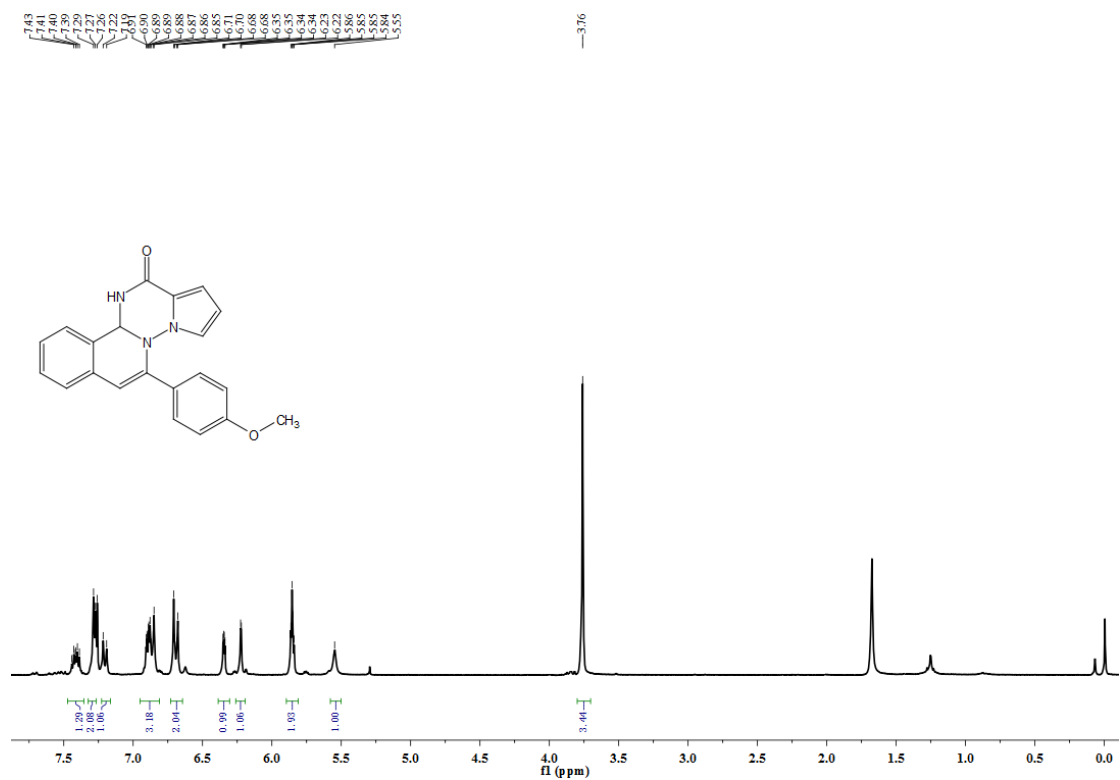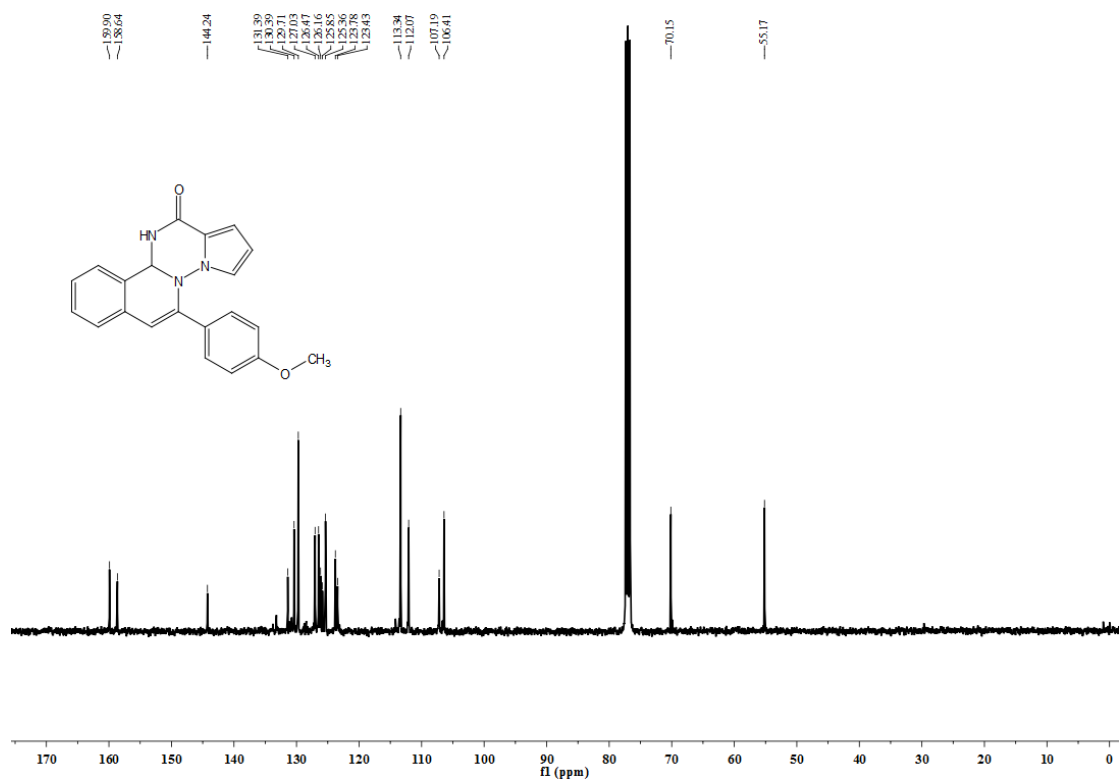

# Compound 3o

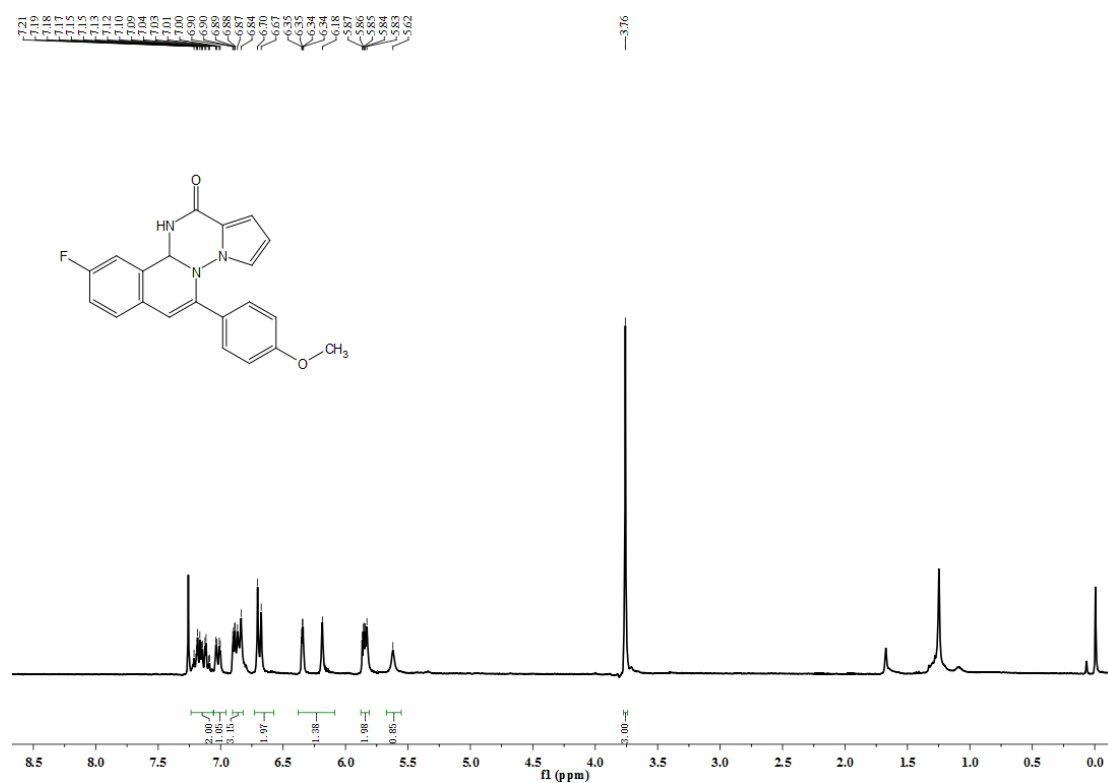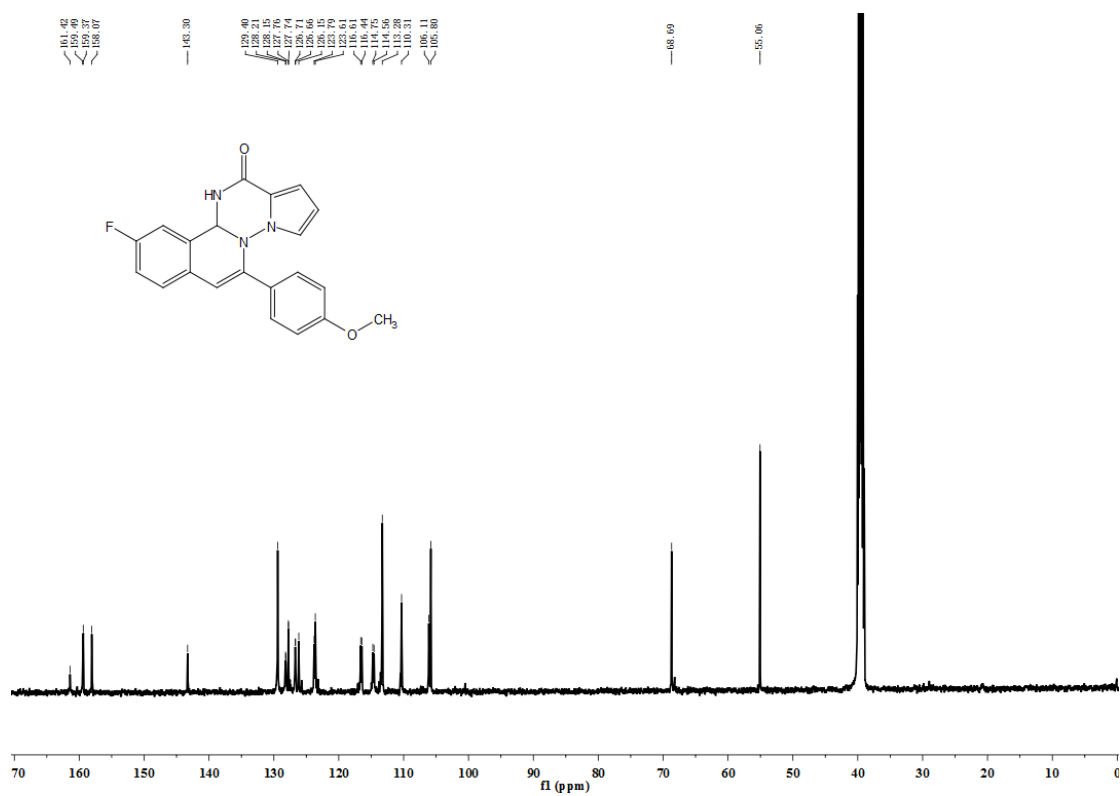

# Compound 3p

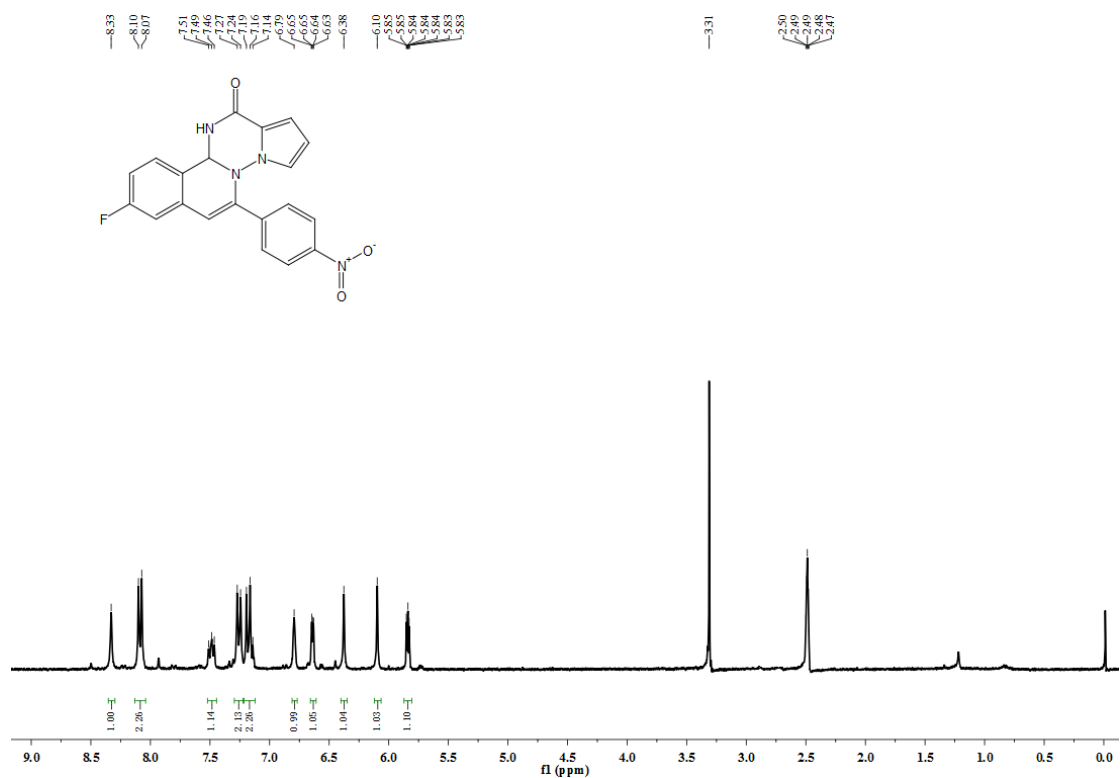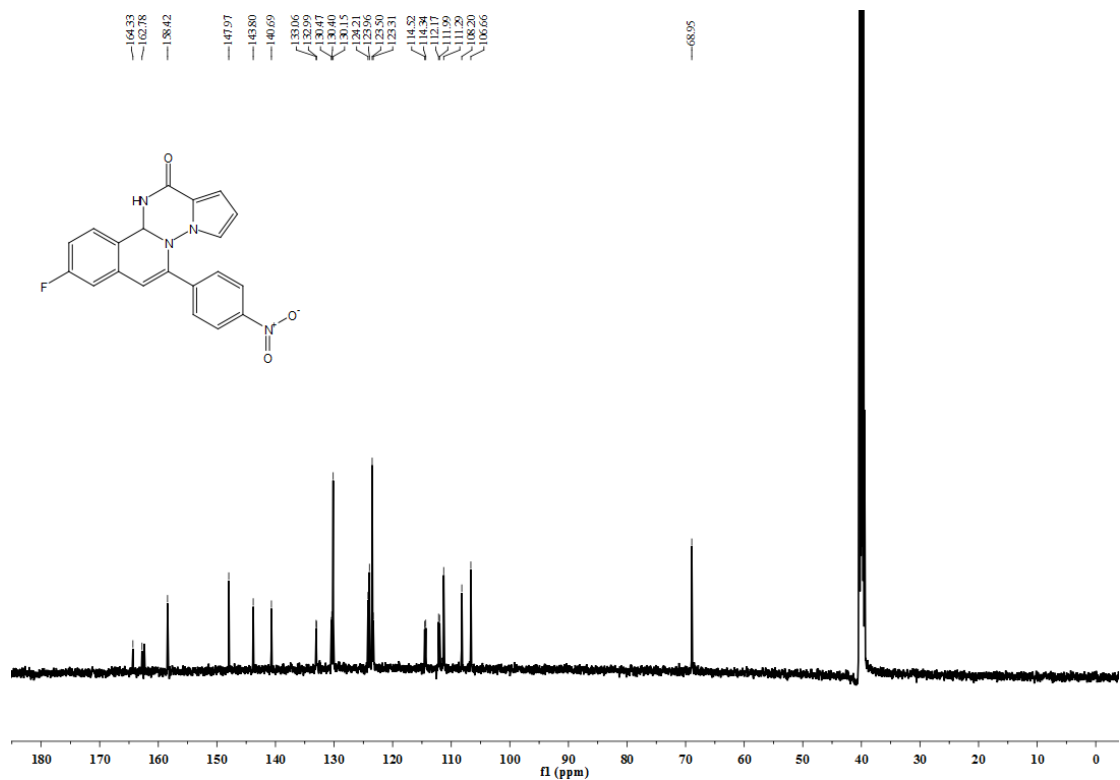

# Compound 3q

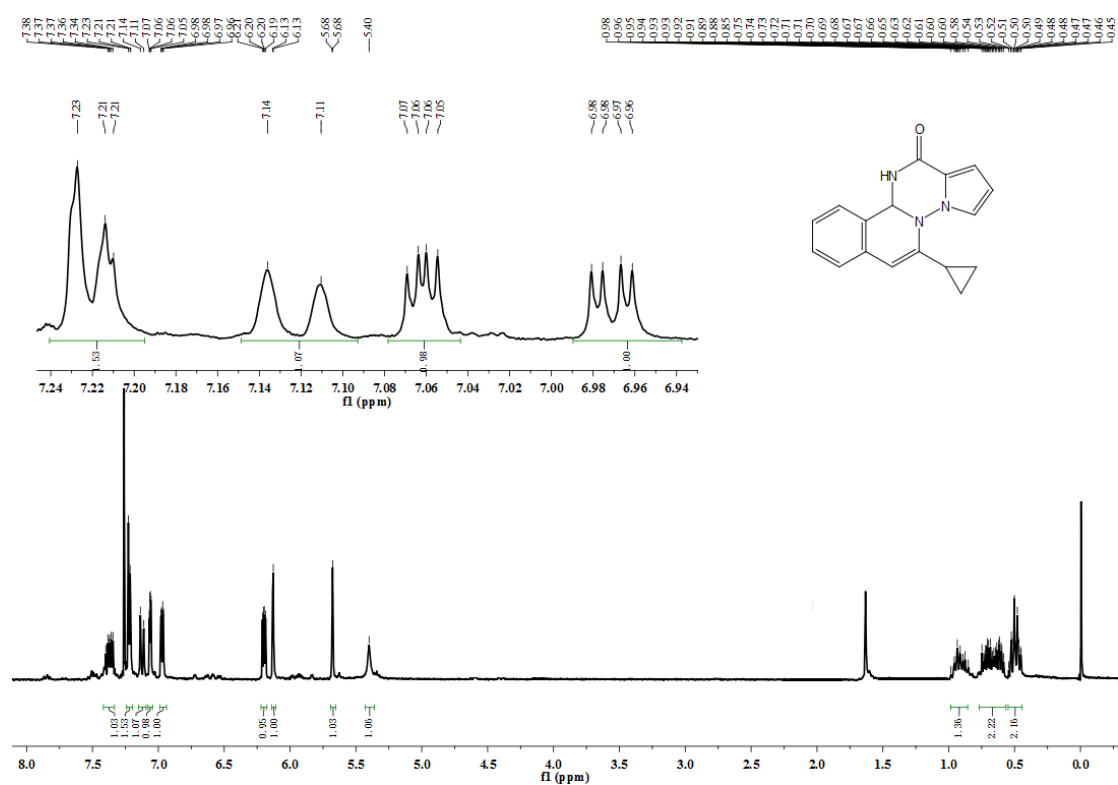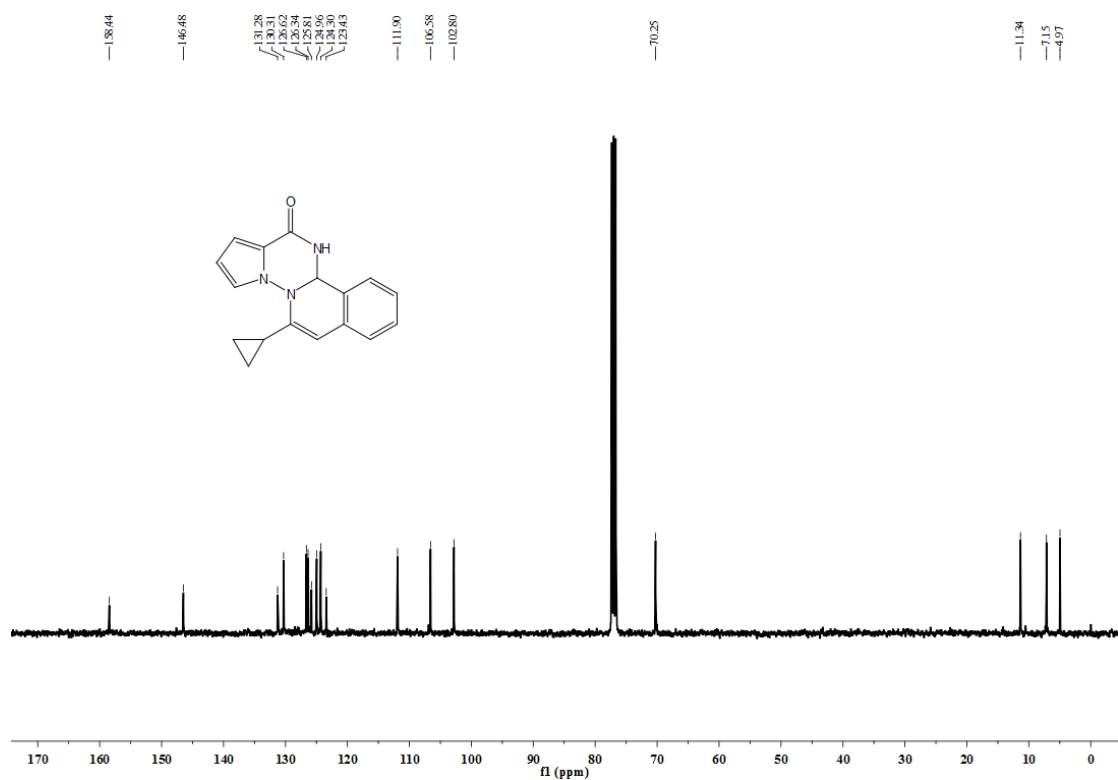



# Compound 3r

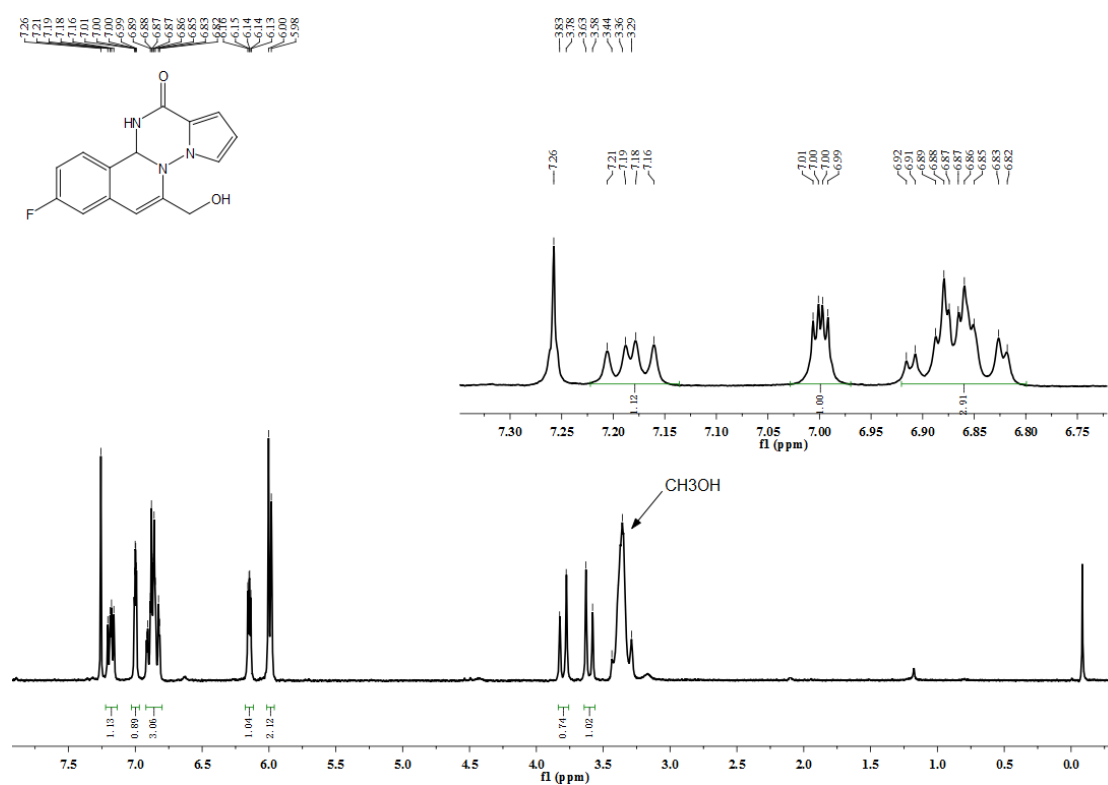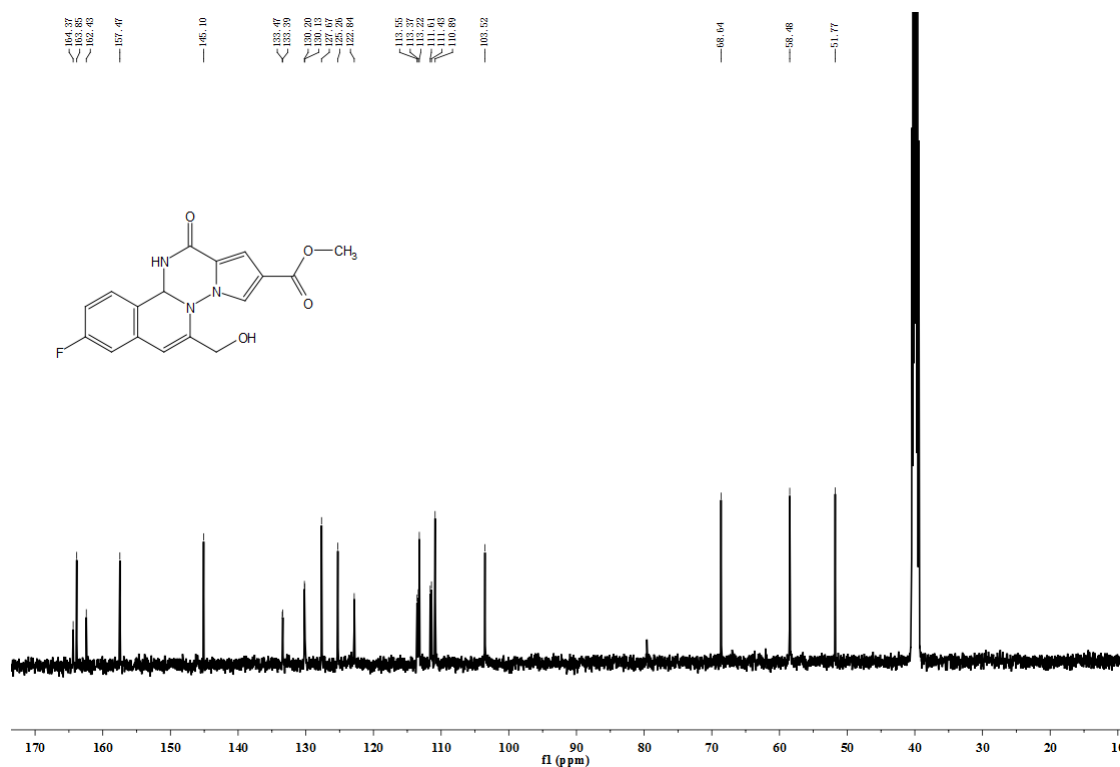

# Compound 3s

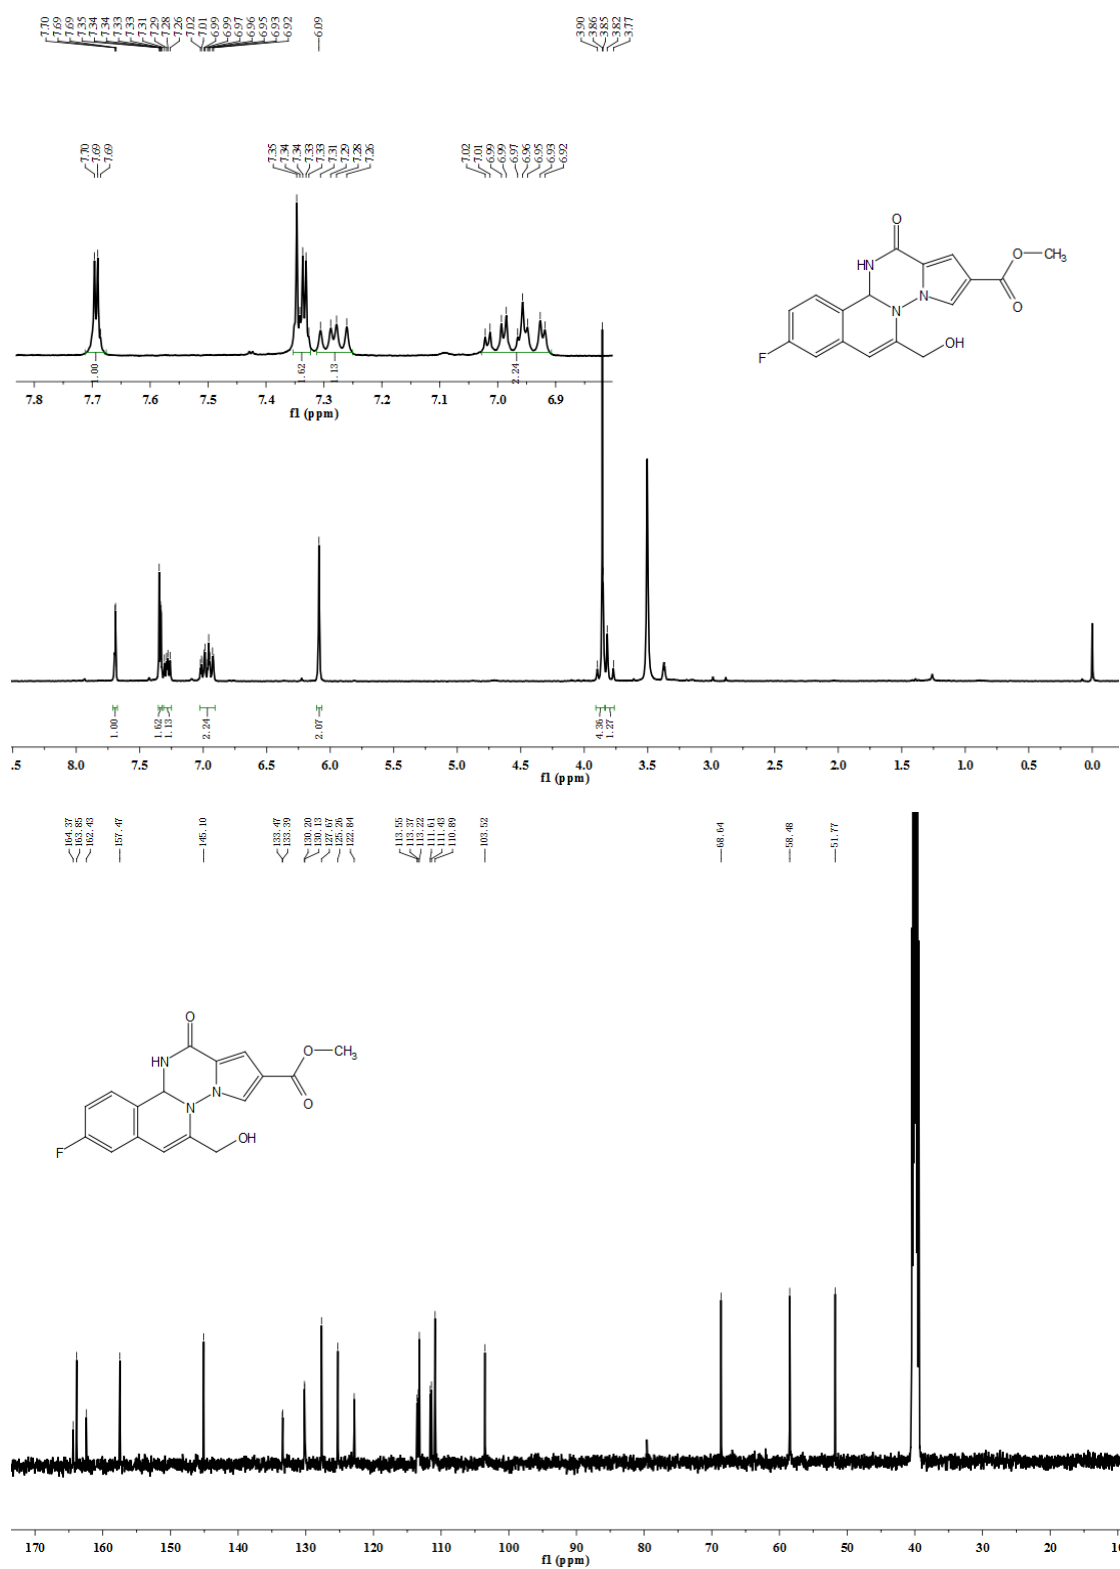

7.45  
7.44  
7.43  
7.43  
7.41  
7.40  
7.39  
7.30  
7.29  
7.28  
7.26  
7.23  
7.21  
7.18  
7.16  
7.15  
7.00  
6.99  
6.99  
6.97  
6.97  
6.89  
6.89  
6.88  
6.87  
6.87  
6.33  
6.33  
6.33  
6.32  
6.23  
6.23  
5.88  
5.82  
5.82  
5.81  
5.80

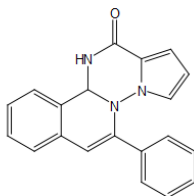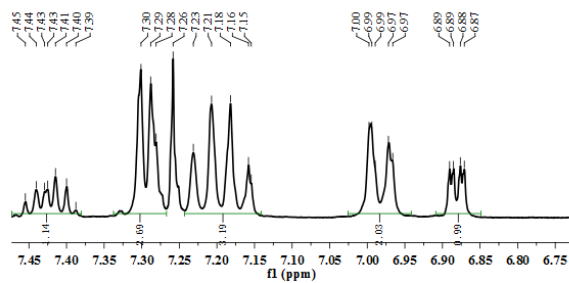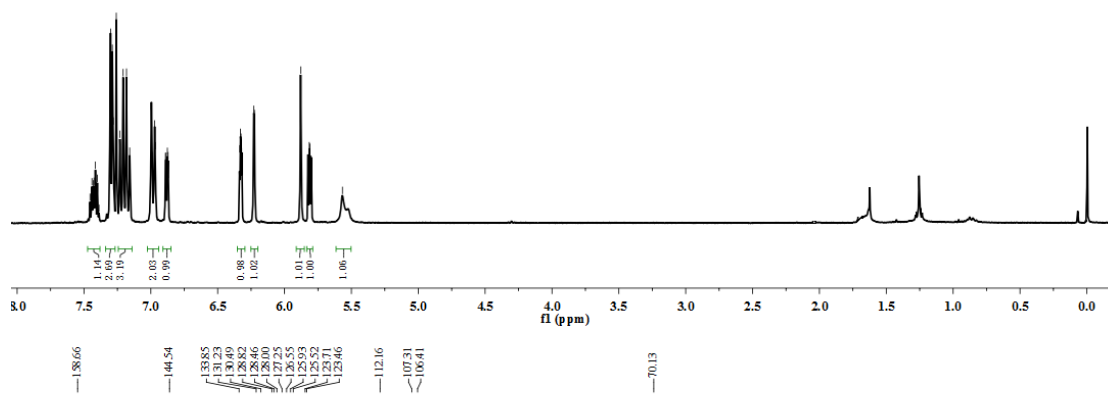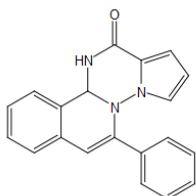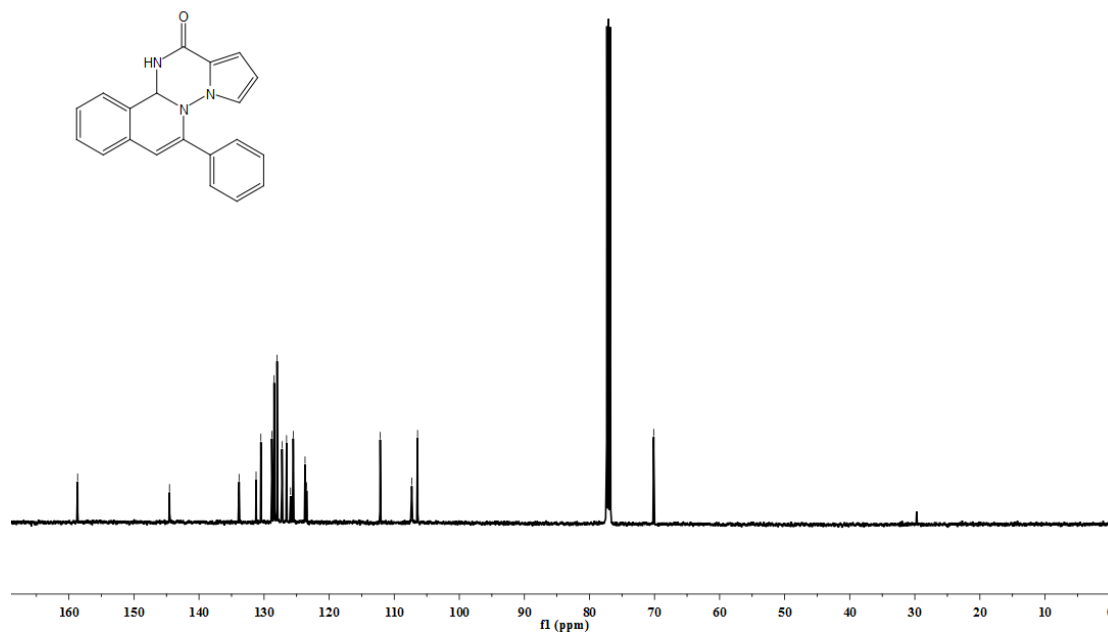

# Compound 3u

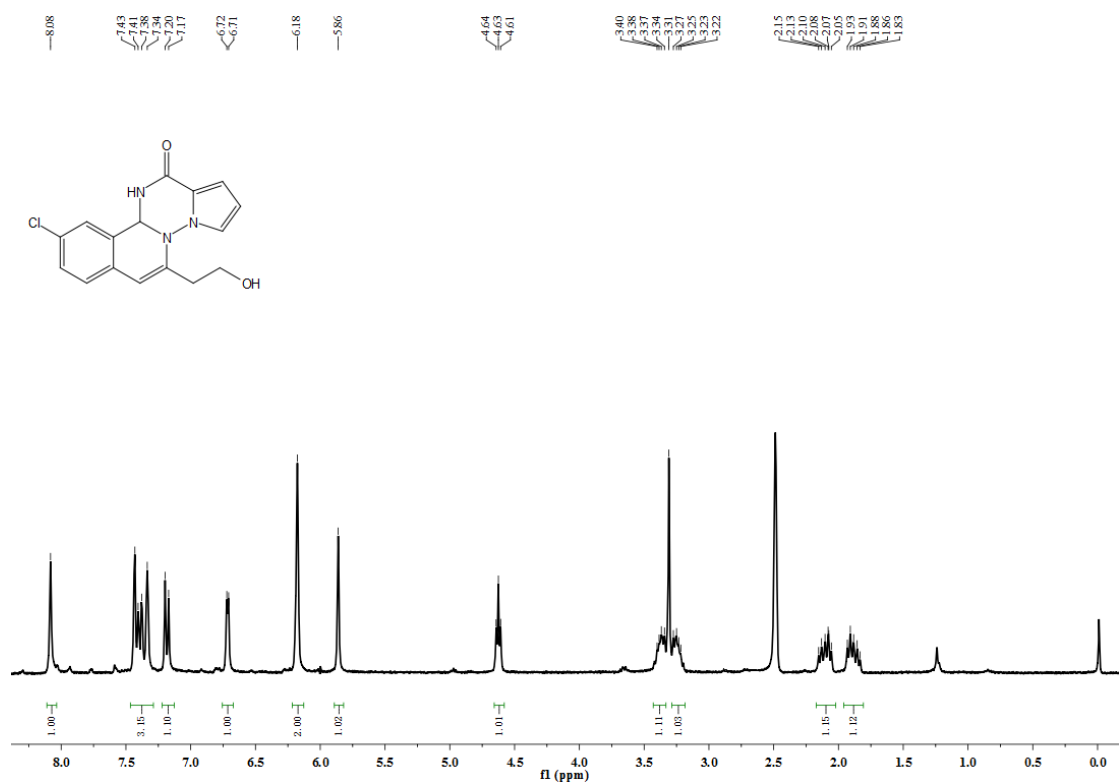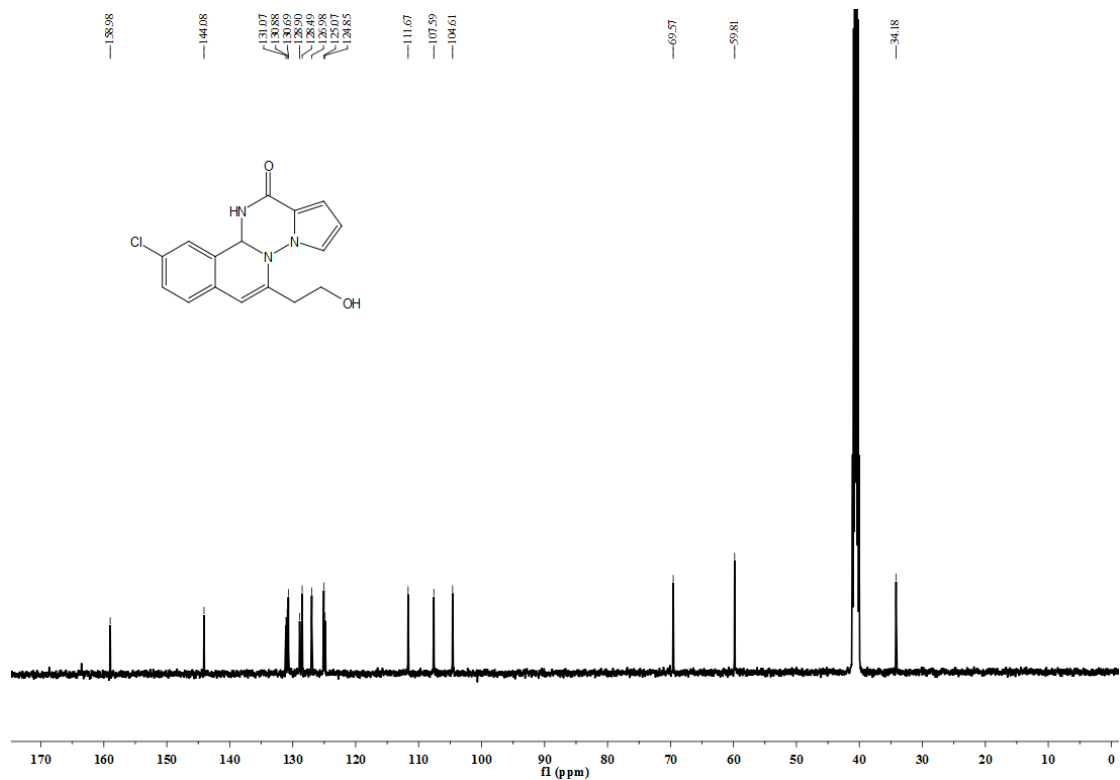

# Compound 3v

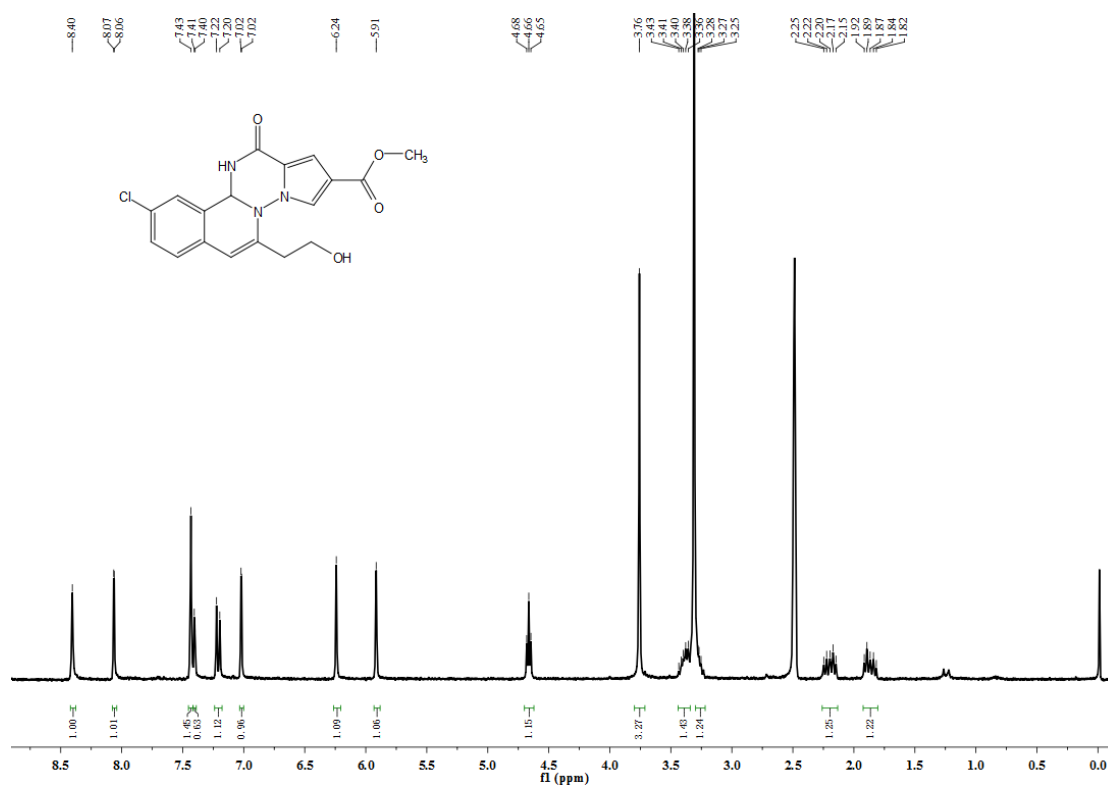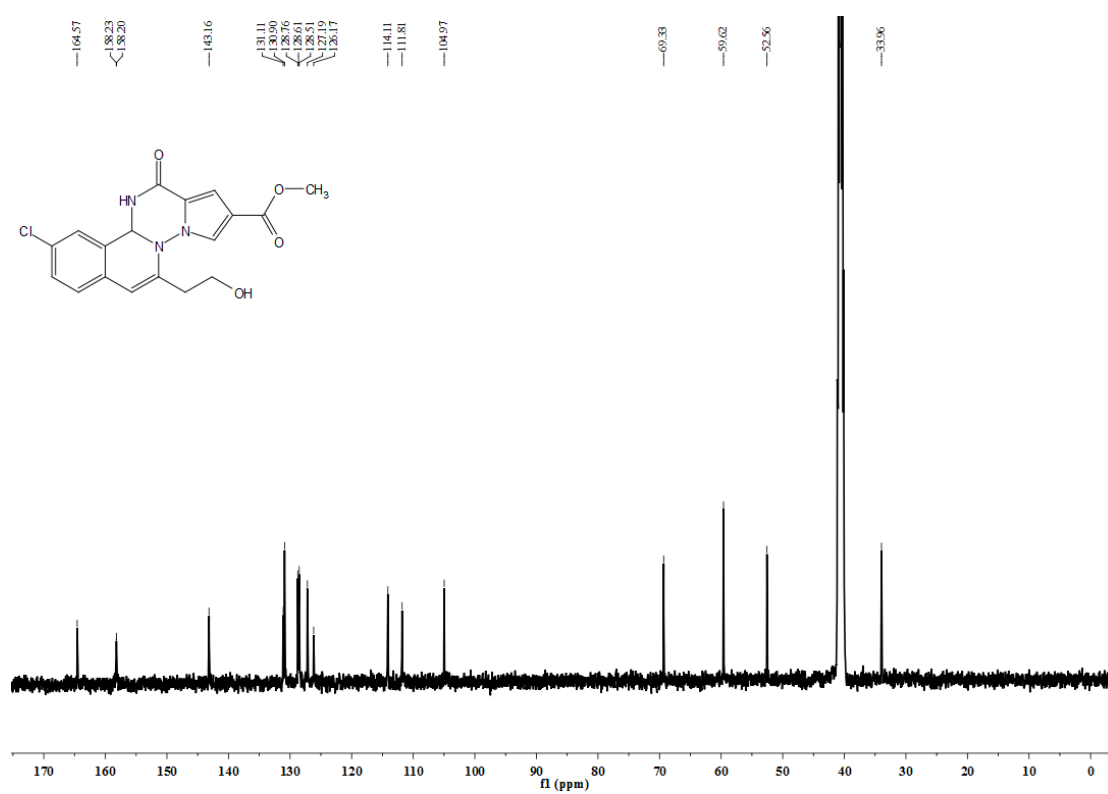

# Compound 3w

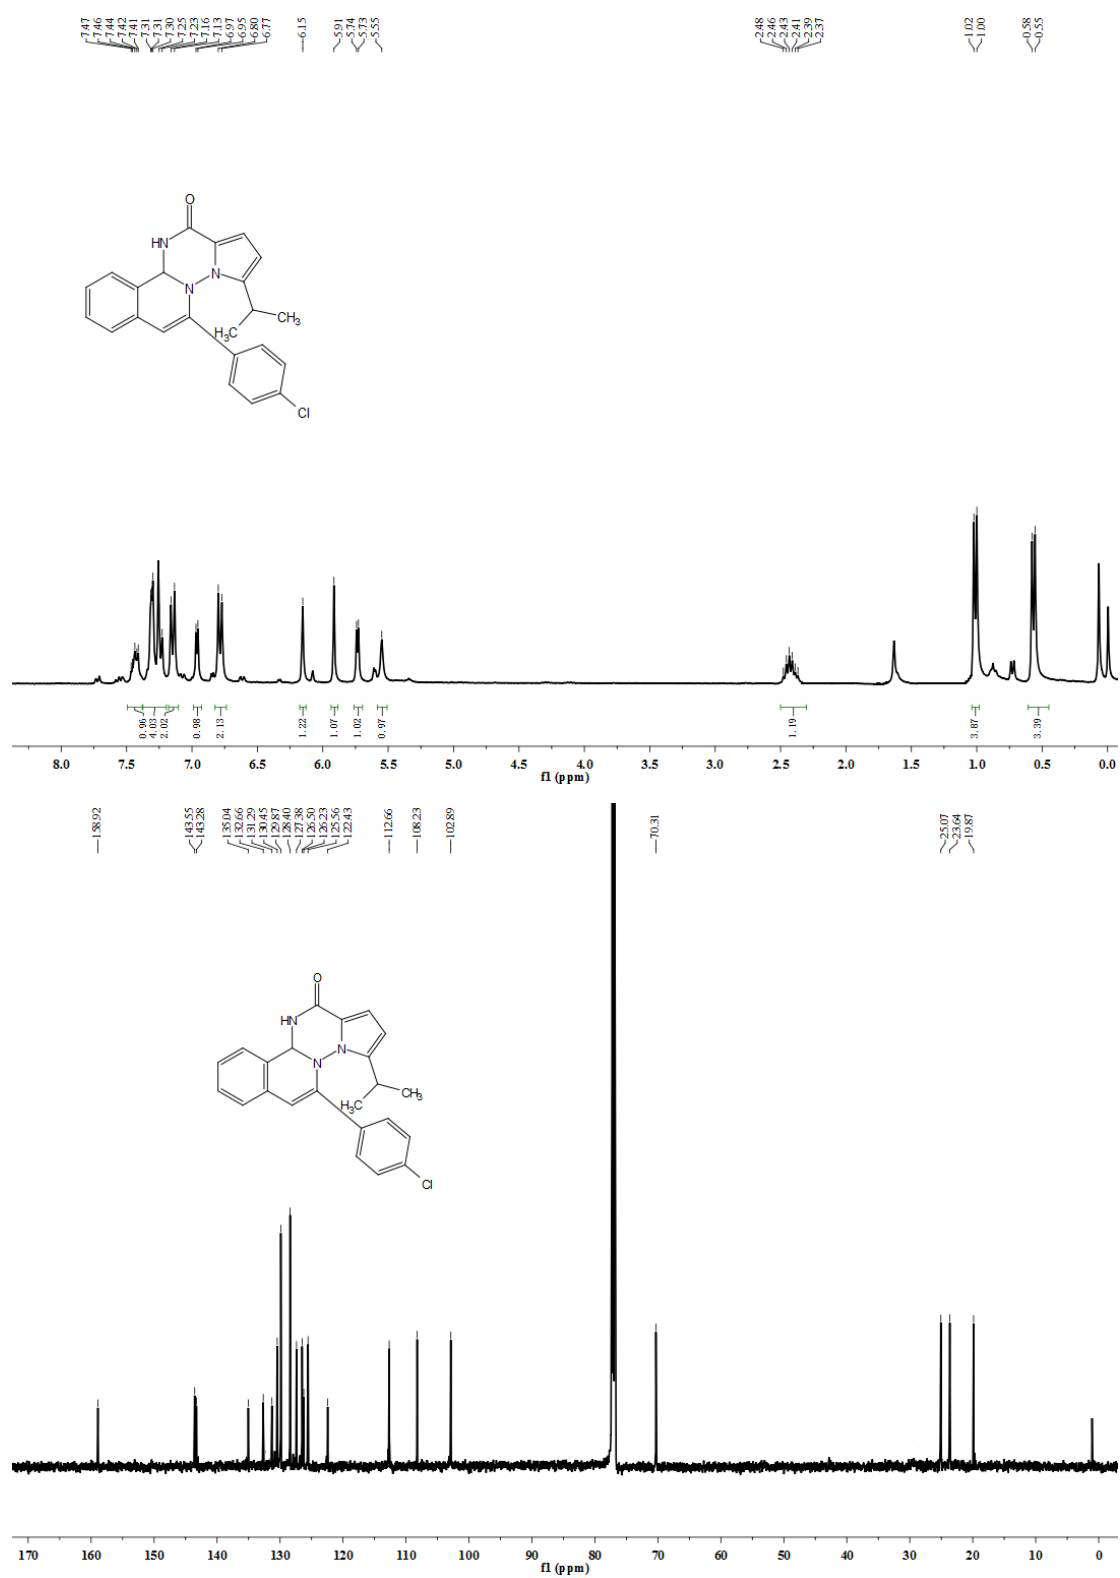

# Compound 4a

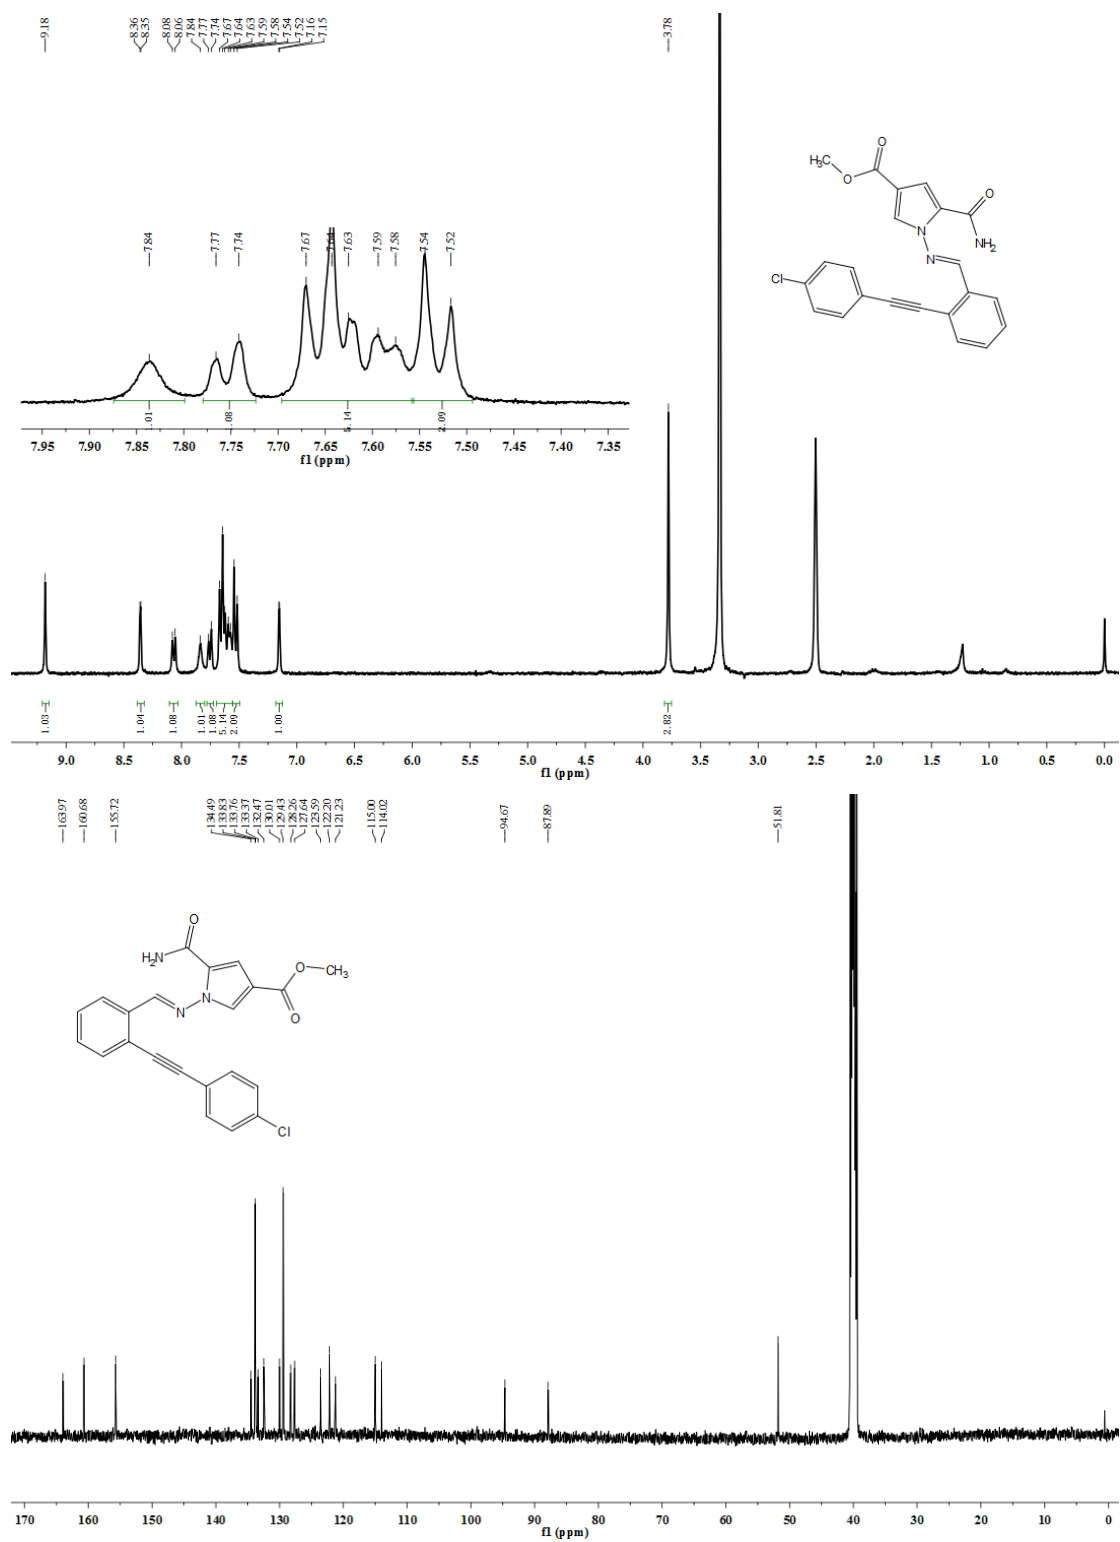

Chemical structure: NC(=O)c1ccn(c1)/C=C/c2ccccc2C#Cc3ccccc3

<sup>1</sup>H NMR spectrum (DMSO-d<sub>6</sub>) showing peaks from 0.0 to 10.0 ppm. The spectrum includes a broad peak at ~9.8 ppm (NH<sub>2</sub>), aromatic signals between 7.3-8.0 ppm, alkyne signals at ~6.2 ppm, and a reference peak at 0 ppm. Integration values are shown below the peaks.

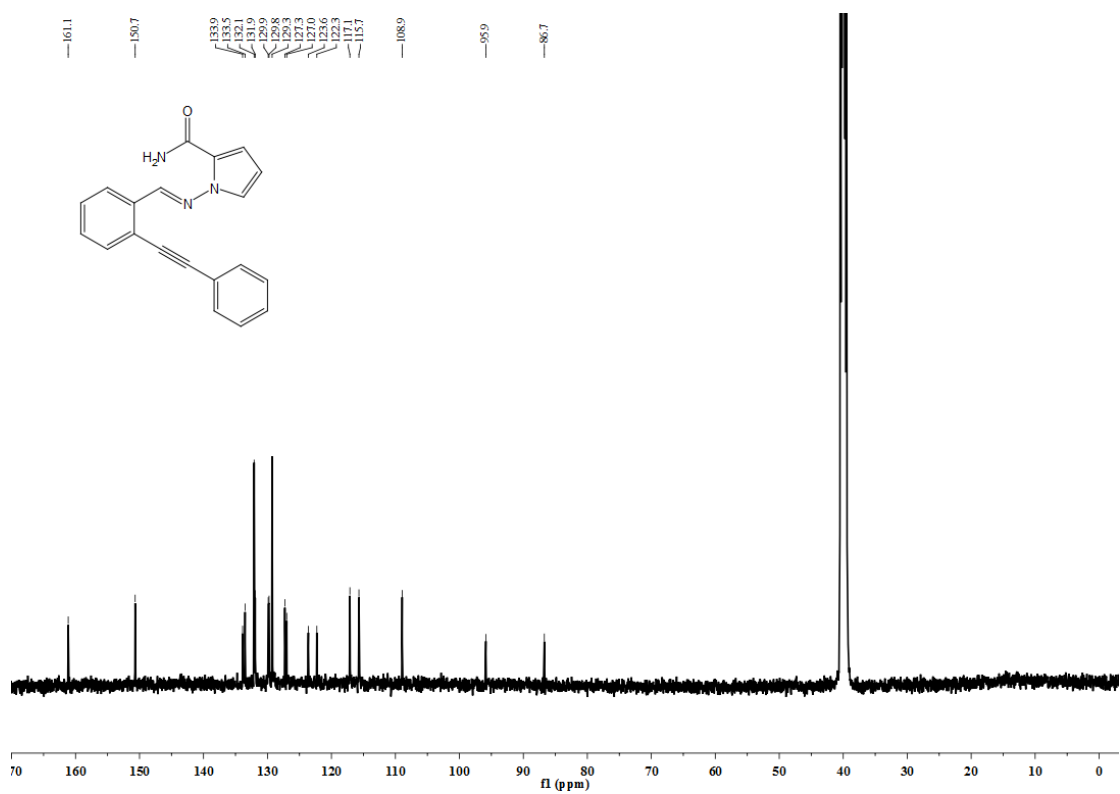

Supplement: c3ra47324d1.pdf [file c3ra47324d1.pdf]
